# Supplementary material for: Tumor‐derived proliferative CTCs and CTC clusters predict aggressiveness and early recurrence in hepatocellular carcinoma patients
Source: PubMed Central journal article supplement (PMC10358265; doi:10.1002/cam4.5946), 2023-06-19
Supplement: CAM4-12-13912-s001.pdf [file CAM4-12-13912-s001.pdf]

# **Tumor-derived proliferative CTCs and CTC clusters predict aggressiveness and early recurrence in hepatocellular carcinoma patients**

## **Supplementary Information**

### **Supplementary Figures**

**Figure S1** The correlation and comparison between PCP and Ki67 expression in primary tumor.

**Figure S2** Performance of driver gene mutation states in predicting recurrence-free survival.

**Figure S3** Performance based on the status of mutations in 4 driver genes in CTCs for predicting recurrence-free survival.

**Figure S4** Performance of CTC clusters in the training and validation data sets.

**Figure S5** Performance of AFP level in predicting recurrence-free survival.

**Figure S6** Performance of the nomogram predictor, CTC number, proliferative CTC percentage and CTC clusters in predicting recurrence-free survival.

### **Supplementary Tables**

**Table S1.** Clinical and pathological characteristics of HCC patients

**Table S2.** Tumor tissue target sequencing panel

**Table S3.** Tumor mutations detected in target panel sequencing

**Table S4.** Tumor mutations detected in corresponding CTCs

**Table S5.** Correlation between clinical parameters and CTC number or proliferative CTC percentage in peripheral blood

**Table S6.** Cox regression model to evaluate recurrence-free survival based on patient characteristics analyzed according to a univariable and multivariable analysis

## Supplementary Figure S1

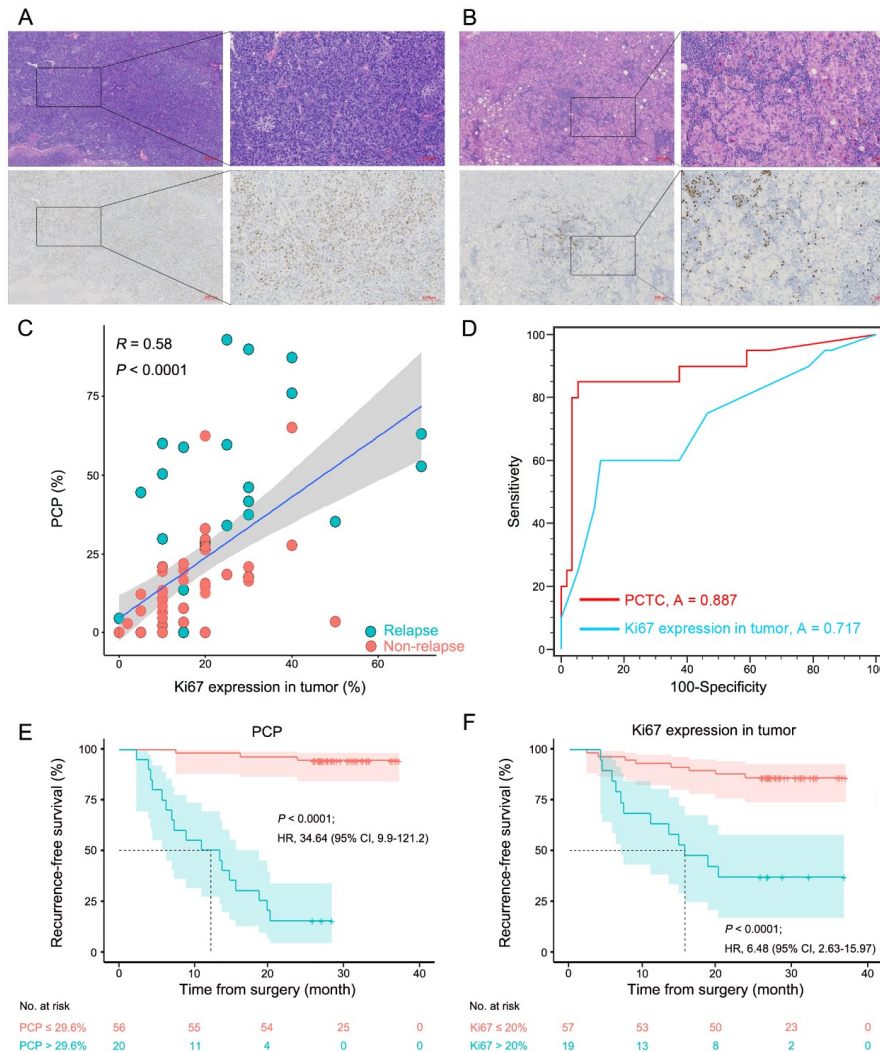

**FIGURE S1** The correlation and comparison between PCP and Ki67 expression in primary tumor. FFPE tissue and hematoxylin and eosin (H&E) sections reviewed by two consultant pathologists. For immunohistochemical (IHC) staining, the tissue sections were deparaffinized in a series of gradient ethanol baths, rehydrated, and immersed in methanol containing 0.3% hydrogen peroxide for 10 min to block endogenous peroxidase at room temperature. Then, the tissue slides were heated for 30 min in a pH 6.0 antigen retrieval solution and then incubated overnight with either an anti-Ki67 antibody (Abcam, ab16667) or control immunoglobulin G (IgG, 1mg/mL) at 4°C. After washing with PBS, the slides were incubated with a ProLink-2 Plus HRP rabbit polymer detection kit (Golden Bridge, USA). The images were scanned using ZEISS Axioscan 7 (Carl Zeiss AG, Germany).

IHC of Ki67 in high (A) and low (B) Ki67 expression HCC patients. The correlation between PCP and Ki67 expression in primary tumor ( $n=76$ , person's  $r=0.58$ ,  $P < 0.0001$ ) (C). The capability of PCP and Ki67 expression in primary tumor in predicting HCC recurrence was estimated with ROC curves (D). Kaplan–Meier analysis of driver gene mutation states for predicting RFS in the PCP (E) and Ki67 expression in primary tumor (F). The cutoff value and  $P$  values were derived from log-rank (Mantel–Cox) tests, and HR values are indicated in the figure. The dashed lines in the figure represent the median survival (months). A, area under the curve; CI, confidence interval; CTC, circulating tumor cell; FFPE, formalin-fixed paraffin-embedded; HR, hazard ratio; PCP, proliferative CTC percentage; R, pearson correlation coefficient; RFS, recurrence-free survival.

## Supplementary Figure S2

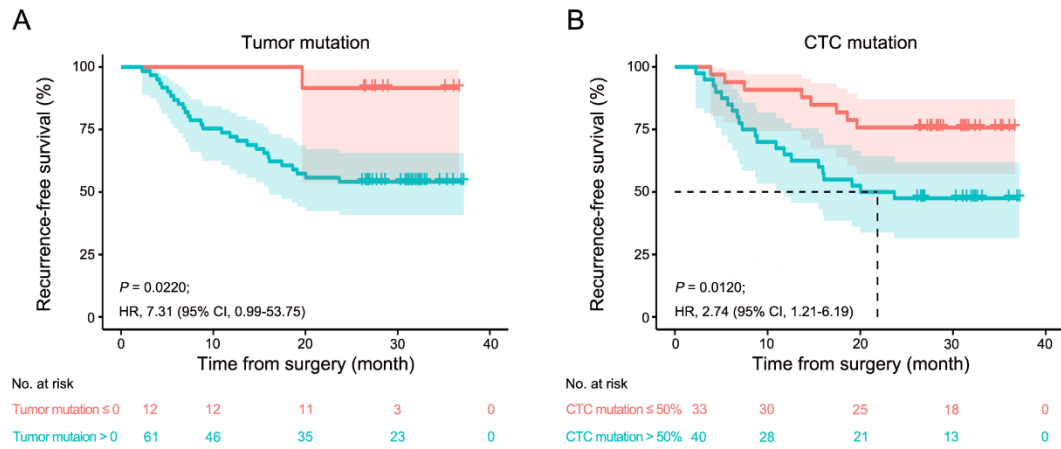

**FIGURE S2** Performance of driver gene mutation states in predicting recurrence-free survival in tumor and CTC. Kaplan–Meier analysis of driver gene mutation status for predicting RFS in the (A) tumor tissue and (B) corresponding CTC. The cutoff value and  $P$  values were derived from log-rank (Mantel–Cox) tests, and HR values are indicated in the figure. The dashed lines in the figure represent the median survival (month). CI, confidence interval; CTC, circulating tumor cell; HR, hazard ratio; RFS, recurrence-free survival.

## Supplementary Figure S3

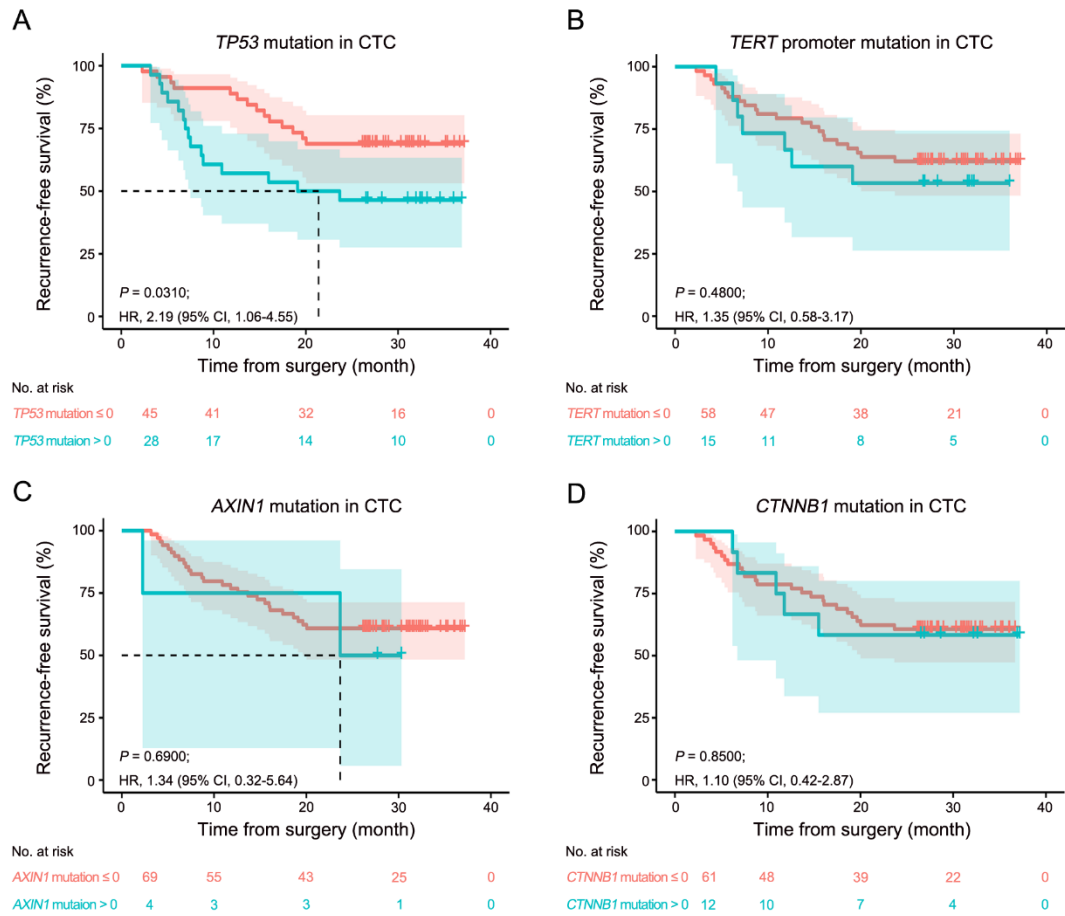

**FIGURE S3** Performance based on the status of mutations in 4 driver genes in CTCs for predicting recurrence-free survival. Kaplan–Meier analysis of the mutation status of 4 driver genes, namely, *TP53* (A), *TERT* promoter (B), *AXIN1* (C) and *CTNNB1* (D), in CTCs for predicting RFS. The cutoff value and  $P$  values were derived from log-rank (Mantel–Cox) tests, and the HR values are indicated in the figure. The dashed lines in the figure represent the median survival (month). CI, confidence interval; CTC, circulating tumor cell; HR, hazard ratio; RFS, recurrence-free survival.

## Supplementary Figure S4

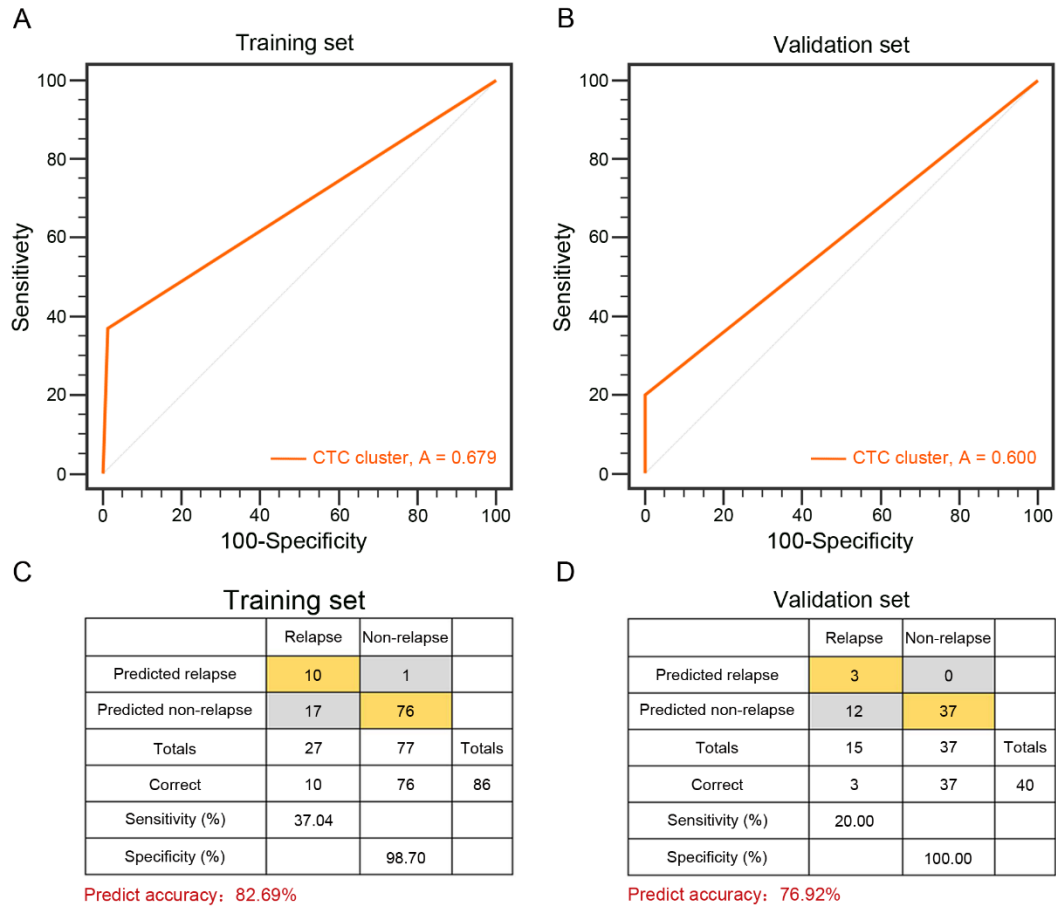

**FIGURE S4** Performance of CTC clusters in the training and validation data sets. (A) and (B) The capability of CTC clusters in predicting HCC recurrence was estimated with ROC curves in the training data set and validation data set. (C) and (D) Confusion tables of the binary results of CTC clusters in the training and validation data sets. A, area under the curve; CTC, circulating tumor cell.

## Supplementary Figure S5

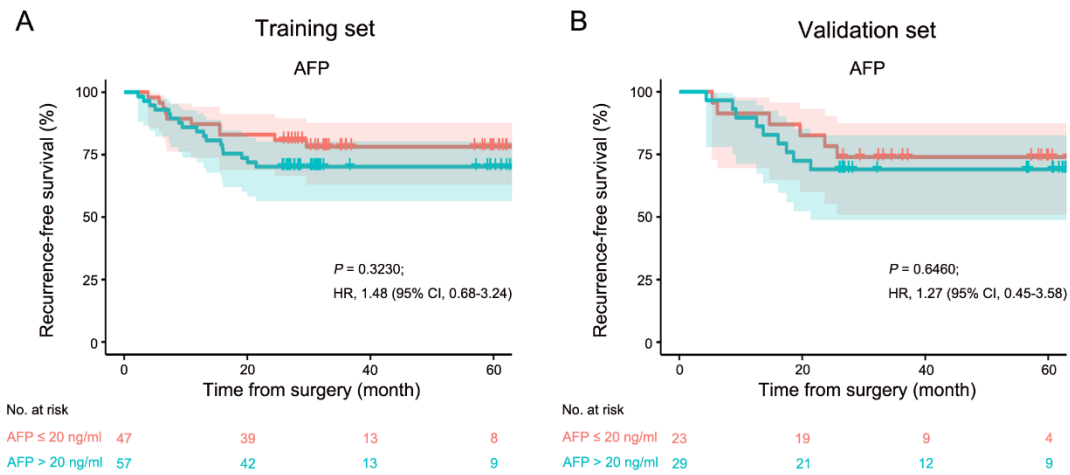

**FIGURE S5** Performance of AFP in predicting recurrence-free survival. Kaplan–Meier analysis of AFP for predicting RFS in the (A) training data set and (B) validation data set. The cutoff value and  $P$  values were derived from log-rank (Mantel–Cox) tests, and HR values are indicated in the figure. The dashed lines in the figure represent the median survival (month). AFP, alpha-fetoprotein; CI, confidence interval; HR, hazard ratio; RFS, recurrence-free survival.

## Supplementary Figure S6

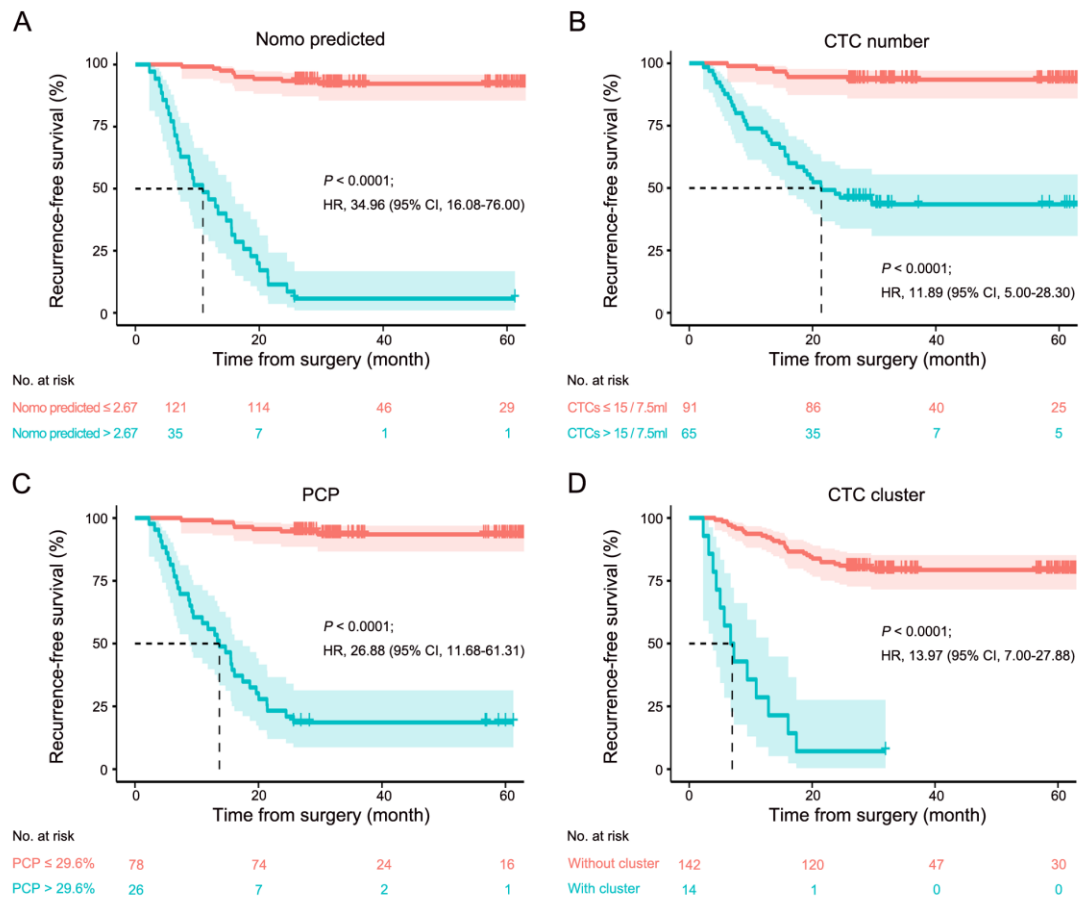

**FIGURE S6** Performance of the nomogram predictor, CTC number, proliferative CTC percentage and CTC clusters in predicting recurrence-free survival. Kaplan–Meier analysis of (A) nomogram predictor, (B) CTC number, (C) PCP and (D) CTC clusters for predicting RFS in the total data set. The cutoff value and  $P$  values were derived from log-rank (Mantel–Cox) tests, and HR values are indicated in the figure. The dashed lines in the figure represent the median survival (month). CI, confidence interval; CTC, circulating tumor cell; HR, hazard ratio; PCP, proliferative CTC percentage; RFS, recurrence-free survival.
