# Supplementary material for: Tumor‐derived proliferative CTCs and CTC clusters predict aggressiveness and early recurrence in hepatocellular carcinoma patients
Source: PubMed Central journal article supplement (PMC10358265; doi:10.1002/cam4.5946), 2023-06-19
Supplement: CAM4-12-13912-s002.pdf [file CAM4-12-13912-s002.pdf]

**Table S1. Clinical and Pathological Characteristics of HCC Patients**

| Clinicopathologic parameters                  |                       |                    |
|-----------------------------------------------|-----------------------|--------------------|
| Age ( <i>N</i> = 270)                         | Median years          | 55 (31-78)         |
| Sex ( <i>N</i> = 270)                         | Female                | 42 (15.56%)        |
|                                               | Male                  | 228 (84.44%)       |
| ALT (U/L) ( <i>N</i> = 270)                   | Median                | 34.4( 9–2342)      |
| AST (U/L) ( <i>N</i> = 270)                   | Median                | 40.45 (11.7–7058)  |
| TBIL (umol/L) ( <i>N</i> = 270)               | Median                | 16.75 (4.2–488)    |
| ALP(U/L) ( <i>N</i> = 270)                    | Median                | 72 (23.7–868)      |
| WBC(*10 <sup>9</sup> /L) ( <i>N</i> = 270)    | Median                | 5.84 (1.48–29.49)  |
| HGB(g/L) ( <i>N</i> = 270)                    | Median                | 135.5(4.3–233)     |
| PLT(*10 <sup>9</sup> /L) ( <i>N</i> = 270)    | Median                | 137.5 (8–1136)     |
| AFP (ng/ml) ( <i>N</i> = 270)                 | Median                | 33.78 (0.61–12100) |
| Largest tumor diameter (mm) ( <i>N</i> = 270) | Median                | 38 (3–210)         |
| Surgical procedure ( <i>N</i> = 270)          | Hepatectomy           | 139 (51.48%)       |
|                                               | Liver transplantation | 131 (48.52%)       |
| Multifocal ( <i>N</i> = 270)                  | Absent                | 225 (83.33%)       |
|                                               | Present               | 45 (16.67%)        |
| HBV ( <i>N</i> = 270)                         | Absent                | 24 (8.89%)         |
|                                               | Present               | 246 (91.11%)       |
| HCV ( <i>N</i> = 270)                         | Absent                | 247 (91.48%)       |
|                                               | Present               | 23 (8.52%)         |
| Prior treatment ( <i>N</i> = 270)             | Absent                | 187 (69.26%)       |
|                                               | TACE                  | 36 (13.33%)        |
|                                               | RFA                   | 21 (7.78%)         |
|                                               | Hepatectomy           | 22 (8.15%)         |
| MVI ( <i>N</i> = 270)                         | RTx                   | 8 (2.96%)          |
|                                               | Chemotherapy          | 1 (0.37%)          |
| Tumor thrombosis ( <i>N</i> = 270)            | Absent                | 193 (71.48%)       |
|                                               | Present               | 77 (28.52%)        |
| Differentiation grade ( <i>N</i> = 268)       | Absent                | 228 (84.44%)       |
|                                               | Present               | 42 (15.56%)        |
|                                               | Well                  | 13 (4.81%)         |
| Child Pugh class ( <i>N</i> = 270)            | Moderately            | 171 (63.33%)       |
|                                               | Poorly                | 84 (31.11%)        |
| Child Pugh class ( <i>N</i> = 270)            | A                     | 232 (85.93%)       |
|                                               | B                     | 33 (12.22%)        |
|                                               | C                     | 5 (1.85%)          |
|                                               | I                     | 153 (56.67%)       |

| Clinicopathologic parameters |     |              |
|------------------------------|-----|--------------|
| AJCC stage ( <i>N</i> = 270) | II  | 93 (34.44%)  |
|                              | III | 24 (8.89%)   |
|                              | A   | 207 (76.67%) |
| BCLC stage ( <i>N</i> = 270) | B   | 34 (12.59%)  |
|                              | C   | 29 (10.74%)  |

AFP, alphafetoprotein; HBV, hepatitis B virus; HCV, hepatitis C virus; AJCC, American Joint Committee on Cancer; BCLC, Barcelona clinic liver cancer stage; MVI, microvascular invasion; ALT: Alaninetransaminase; AST: Alaninetransaminase; TBIL: total bilirubin; ALP: alkaline phosphatase; WBC: white blood cell; HGB: hemoglobin; PLT: platelet count; TACE: transcatheter arterial chemoembolization; RFA: radiofrequency ablation; RTx: radiotherapy.

**Table S2. Tumor tissue target sequencing panel**

| Target ID            | Interval                 |
|----------------------|--------------------------|
| <i>ADGRB1</i>        | chr8:143545550-143625788 |
| <i>ADGRB3</i>        | chr6:69348558-70098793   |
| <i>ARID1A</i>        | chr1:27022885-27107257   |
| <i>ARID2</i>         | chr12:46123610-46298871  |
| <i>ATRX</i>          | chrX:76763819-77041497   |
| <i>AXINI</i>         | chr16:338112-397035      |
| <i>CDKN2A</i>        | chr9:21968198-21994463   |
| <i>TERT</i> promoter | chr5:1295000-1301000     |
| <i>CTNNB1</i>        | chr3:41265550-41280843   |
| <i>KIT</i>           | chr4:55524172-55604733   |
| <i>MEN1</i>          | chr11:64571796-64577591  |
| <i>RBI</i>           | chr13:48878039-49054217  |
| <i>SETD2</i>         | chr3:47058573-47205424   |
| <i>SMARCA4</i>       | chr19:11094818-11175887  |
| <i>TP53</i>          | chr17:7565247-7579922    |
| <i>TSC2</i>          | chr16:2098261-2138621    |

**Table S3. Tumor mutations detected in target panel sequencing**

| Sample_ID | Gene_Name     | Entrez_Gene_ID | Chromosome | Start_position | End_position | Variant_Classification | Variant_Type | Ref | Alt                             | dbSNP_RS    | Exon_num | cDNA_Change                   | Protein_Change     | Tumor_depth | Tumor_mutation_frequency |
|-----------|---------------|----------------|------------|----------------|--------------|------------------------|--------------|-----|---------------------------------|-------------|----------|-------------------------------|--------------------|-------------|--------------------------|
| L100tumor | <i>AXIN1</i>  | 8312           | 16         | 396792         | 396792       | frameshift_variant     | DEL          | G   | -                               | .           | 2 11     | c.234delC                     | p.Thr79ProfsTer5   | 3289        | 0.135                    |
| L100tumor | <i>ARID2</i>  | 196528         | 12         | 46245966       | 46245966     | stop_gained            | SNP          | A   | T                               | .           | 15 21    | c.4060A>T                     | p.Arg1354Ter       | 939         | 0.15                     |
| L100tumor | <i>TSC2</i>   | 7249           | 16         | 2108755        | 2108755      | missense_variant       | SNP          | A   | G                               | rs1800748   | 10 42    | c.856A>G                      | p.Met286Val        | 1308        | 0.504                    |
| L100tumor | <i>TSC2</i>   | 7249           | 16         | 2112569        | 2112569      | missense_variant       | SNP          | G   | T                               | .           | 13 42    | c.1329G>T                     | p.Gln443His        | 1937        | 0.136                    |
| L100tumor | <i>TSC2</i>   | 7249           | 16         | 2121870        | 2121870      | missense_variant       | SNP          | G   | A                               | rs200494044 | 19 42    | c.2032G>A                     | p.Ala678Thr        | 3910        | 0.479                    |
| L100tumor | <i>AXIN1</i>  | 8312           | 16         | 396815         | 396815       | stop_gained            | SNP          | C   | A                               | .           | 2 11     | c.211G>T                      | p.Glu71Ter         | 1800        | 0.144                    |
| L100tumor | <i>PIK3R5</i> | 23533          | 17         | 8792116        | 8792118      | inframe_deletion       | DEL          | CCT | -                               | rs757971428 | 10 19    | c.986_988delAGG               | p.Glu329del        | 39          | 0.231                    |
| L102tumor | <i>TP53</i>   | 7157           | 17         | 7577548        | 7577548      | missense_variant       | SNP          | C   | T                               | .           | 7 11     | c.733G>A                      | p.Gly245Ser        | 1515        | 0.424                    |
| L102tumor | <i>ARID1A</i> | 8289           | 1          | 27100182       | 27100184     | inframe_deletion       | DEL          | GCA | -                               | rs374564889 | 16 20    | c.3999_4001delGCA             | p.Gln1334del       | 4188        | 0.033                    |
| L102tumor | <i>ARID2</i>  | 196528         | 12         | 46246020       | 46246020     | missense_variant       | SNP          | T   | G                               | .           | 15 21    | c.4114T>G                     | p.Leu1372Val       | 878         | 0.492                    |
| L102tumor | <i>TSC2</i>   | 7249           | 16         | 2138304        | 2138304      | missense_variant       | SNP          | A   | C                               | .           | 41 42    | c.5237A>C                     | p.His1746Pro       | 1342        | 0.7                      |
| L102tumor | <i>AXIN1</i>  | 8312           | 16         | 396176         | 396176       | stop_gained            | SNP          | T   | A                               | .           | 2 11     | c.850A>T                      | p.Arg284Ter        | 1397        | 0.679                    |
| L102tumor | <i>TP53</i>   | 7157           | 17         | 7577547        | 7577547      | missense_variant       | SNP          | C   | A                               | .           | 7 11     | c.734G>T                      | p.Gly245Val        | 1516        | 0.412                    |
| L102tumor | <i>BAI3</i>   | 577            | 6          | 70070920       | 70070920     | missense_variant       | SNP          | A   | C                               | .           | 29 32    | c.3755A>C                     | p.Gln1252Pro       | 1836        | 0.393                    |
| L102tumor | <i>BAI1</i>   | 575            | 8          | 143545614      | 143545616    | inframe_deletion       | DEL          | CTG | -                               | rs777000151 | 1 30     | c.70_72delCTG                 | p.Leu24del         | 2511        | 0.032                    |
| L102tumor | <i>ATRX</i>   | 546            | X          | 76907782       | 76907784     | inframe_deletion       | DEL          | TCC | -                               | rs398123423 | 15 35    | c.4377_4379delGGA             | p.Glu1464del       | 1175        | 0.021                    |
| L103tumor | <i>HEG1</i>   | 57493          | 3          | 124732416      | 124732417    | inframe_insertion      | INS          | -   | GAA<br>GAG<br>GAG<br>GAG<br>GAG | rs754557087 | 6 17     | c.1992_2006dupCTCCTCCTCCTCTTC | p.Ser668_Ser672dup | 140         | 0.043                    |

| Sample_ID | Gene_Name     | Entrez_Gene_ID | Chromosome | Start_position | End_position | Variant_Classification  | Variant_Type | Ref                      | Alt | dbSNP_RS    | Exon_num | cDNA_Change                    | Protein_Change           | Tumor_mutation_depth | Tumor_mutation_frequency |
|-----------|---------------|----------------|------------|----------------|--------------|-------------------------|--------------|--------------------------|-----|-------------|----------|--------------------------------|--------------------------|----------------------|--------------------------|
| L103tumor | <i>TP53</i>   | 7157           | 17         | 7579592        | 7579592      | splice_acceptor_variant | SNP          | T                        | A   | .           | 4 11     | c.97-2A>T                      | .                        | 997                  | 0.26                     |
| L103tumor | <i>TERT</i>   | .              | 5          | 1295228        | 1295228      | upstream_gene_variant   | SNP          | G                        | A   | .           | N A      | .                              | .                        | 88                   | 0.125                    |
| L104LNM   | <i>ARID2</i>  | 196528         | 12         | 46243401       | 46243403     | inframe_deletion        | DEL          | ATT                      | -   | .           | 14 21    | c.1754_1756delATT              | p.Asp585_Ser586delinsAla | 3936                 | 0.338                    |
| L104LNM   | <i>ARID2</i>  | 196528         | 12         | 46243404       | 46243404     | missense_variant        | SNP          | C                        | G   | .           | 14 21    | c.1757C>G                      | p.Ser586Cys              | 2600                 | 0.339                    |
| L104LNM   | <i>ZFH3</i>   | 463            | 16         | 72822563       | 72822564     | inframe_insertion       | INS          | -                        | TGC | rs376311468 | 10 10    | c.9609_9611dupGCA              | p.Gln3204dup             | 63                   | 0.508                    |
| L104LNM   | <i>TP53</i>   | 7157           | 17         | 7578552        | 7578552      | stop_gained             | SNP          | G                        | C   | .           | 5 11     | c.378C>G                       | p.Tyr126Ter              | 1368                 | 0.606                    |
| L104LNM   | <i>TERT</i>   | .              | 5          | 1295228        | 1295228      | upstream_gene_variant   | SNP          | G                        | A   | .           | N A      | .                              | .                        | 239                  | 0.297                    |
| L104tumor | <i>ARID2</i>  | 196528         | 12         | 46243404       | 46243404     | missense_variant        | SNP          | C                        | G   | .           | 14 21    | c.1757C>G                      | p.Ser586Cys              | 1900                 | 0.075                    |
| L104tumor | <i>ZFH3</i>   | 463            | 16         | 72822563       | 72822564     | inframe_insertion       | INS          | -                        | TGC | rs376311468 | 10 10    | c.9609_9611dupGCA              | p.Gln3204dup             | 83                   | 0.494                    |
| L104tumor | <i>TP53</i>   | 7157           | 17         | 7578552        | 7578552      | stop_gained             | SNP          | G                        | C   | .           | 5 11     | c.378C>G                       | p.Tyr126Ter              | 1733                 | 0.1                      |
| L104tumor | <i>TERT</i>   | .              | 5          | 1295228        | 1295228      | upstream_gene_variant   | SNP          | G                        | A   | .           | N A      | .                              | .                        | 208                  | 0.053                    |
| L105tumor | -             |                |            |                |              |                         |              |                          |     |             |          |                                |                          |                      |                          |
| L108tumor | <i>KIT</i>    | 3815           | 4          | 55592079       | 55592079     | missense_variant        | SNP          | C                        | G   | rs200518498 | 9 21     | c.1403C>G                      | p.Pro468Arg              | 130                  | 0.131                    |
| L108tumor | <i>TP53</i>   | 7157           | 17         | 7577600        | 7577611      | splice_acceptor_variant | DEL          | AGA<br>GCC<br>AAC<br>CTA | -   | .           | 7 11     | c.673-3_681delTAGGTTG<br>GCTCT | .                        | 440                  | 0.132                    |
| L11tumor  | <i>ARID2</i>  | 196528         | 12         | 46245589       | 46245589     | stop_gained             | SNP          | C                        | A   | .           | 15 21    | c.3683C>A                      | p.Ser1228Ter             | 4366                 | 0.023                    |
| L11tumor  | <i>TP53</i>   | 7157           | 17         | 7578403        | 7578403      | missense_variant        | SNP          | C                        | A   | .           | 5 11     | c.527G>T                       | p.Cys176Phe              | 2507                 | 0.415                    |
| L12tumor  | <i>TP53</i>   | 7157           | 17         | 7577580        | 7577580      | missense_variant        | SNP          | T                        | C   | rs587780073 | 7 11     | c.701A>G                       | p.Tyr234Cys              | 1150                 | 0.746                    |
| L15tumor  | <i>ARID1A</i> | 8289           | 1          | 27023052       | 27023052     | missense_variant        | SNP          | C                        | A   | .           | 1 20     | c.158C>A                       | p.Ala53Asp               | 31                   | 0.065                    |
| L15tumor  | <i>BAIL</i>   | 575            | 8          | 143592291      | 143592291    | splice_acceptor_variant | SNP          | A                        | C   | .           | 17 30    | c.2676-2A>C                    | .                        | 773                  | 0.031                    |
| L15tumor  | <i>BAIL</i>   | 575            | 8          | 143623763      | 143623763    | missense_variant        | SNP          | G                        | C   | .           | 27 30    | c.4168G>C                      | p.Ala1390Pro             | 1087                 | 0.03                     |

| Sample_ID    | Gene_Name     | Entrez_Gene_ID | Chromosome | Start_position | End_position | Variant_Classification  | Variant_Type | Ref | Alt | dbSNP_RS    | Exon_num | cDNA_Change | Protein_Change     | Tumor_mutation_depth | Tumor_mutation_frequency |
|--------------|---------------|----------------|------------|----------------|--------------|-------------------------|--------------|-----|-----|-------------|----------|-------------|--------------------|----------------------|--------------------------|
| L15tumor     | <i>CTNNB1</i> | 1499           | 3          | 41274859       | 41274859     | missense_variant        | SNP          | T   | G   | .           | 8 15     | c.1109T>G   | p.Leu370Arg        | 3859                 | 0.003                    |
| L15tumor     | <i>TP53</i>   | 7157           | 17         | 7577098        | 7577098      | missense_variant        | SNP          | T   | A   | .           | 8 11     | c.840A>T    | p.Arg280Ser        | 5206                 | 0.003                    |
| L15 re-tumor | <i>CTNNB1</i> | 1499           | 3          | 41274859       | 41274859     | missense_variant        | SNP          | T   | G   | .           | 8 15     | c.1109T>G   | p.Leu370Arg        | 5967                 | 0.049                    |
| L15 re-tumor | <i>BAI1</i>   | 575            | 8          | 143592291      | 143592291    | splice_acceptor_variant | SNP          | A   | C   | .           | 17 30    | c.2676-2A>C | .                  | 283                  | 0.067                    |
| L15 re-tumor | <i>TP53</i>   | 7157           | 17         | 7577098        | 7577098      | missense_variant        | SNP          | T   | A   | .           | 8 11     | c.840A>T    | p.Arg280Ser        | 4245                 | 0.054                    |
| L16tumor     | <i>TP53</i>   | 7157           | 17         | 7577534        | 7577534      | missense_variant        | SNP          | C   | A   | rs28934571  | 7 11     | c.747G>T    | p.Arg249Ser        | 1068                 | 0.176                    |
| L17tumor     | <i>RBI</i>    | 5925           | 13         | 48916733       | 48916733     | splice_acceptor_variant | SNP          | A   | T   | .           | 3 27     | c.265-2A>T  | .                  | 619                  | 0.16                     |
| L17tumor     | <i>RBI</i>    | 5925           | 13         | 49037866       | 49037866     | splice_acceptor_variant | SNP          | G   | T   | rs587778860 | 21 27    | c.2107-1G>T | .                  | 382                  | 0.118                    |
| L17tumor     | <i>TERT</i>   | .              | 5          | 1295228        | 1295228      | upstream_gene_variant   | SNP          | G   | A   | .           | N A      | .           | .                  | 94                   | 0.191                    |
| L18tumor     | <i>RBI</i>    | 5925           | 13         | 48934227       | 48934227     | stop_gained             | SNP          | A   | .   | .           | 7 27     | c.682A>T    | p.Lys228Ter        | 2506                 | 0.077                    |
| L1tumor      | <i>CTNNB1</i> | 1499           | 3          | 41266101       | 41266101     | missense_variant        | SNP          | C   | G   | .           | 3 15     | c.98C>G     | p.Ser33Cys         | 2425                 | 0.113                    |
| L2tumor      | <i>CTNNB1</i> | 1499           | 3          | 41266098       | 41266098     | missense_variant        | SNP          | A   | G   | .           | 3 15     | c.95A>G     | p.Asp32Gly         | 1105                 | 0.094                    |
| L2tumor      | <i>BAI1</i>   | 575            | 8          | 143563046      | 143563046    | missense_variant        | SNP          | T   | C   | .           | 10 30    | c.2104T>C   | p.Tyr702His        | 380                  | 0.121                    |
| L2tumor      | <i>ARID2</i>  | 196528         | 12         | 46285594       | 46285594     | missense_variant        | SNP          | C   | T   | .           | 17 21    | c.4954C>T   | p.His1652Tyr       | 564                  | 0.115                    |
| L2tumor      | <i>TP53</i>   | 7157           | 17         | 7578268        | 7578268      | missense_variant        | SNP          | A   | C   | .           | 6 11     | c.581T>G    | p.Leu194Arg        | 468                  | 0.131                    |
| L20tumor     | <i>ARID1A</i> | 8289           | 1          | 27023883       | 27023883     | missense_variant        | SNP          | C   | T   | .           | 1 20     | c.989C>T    | p.Ala330Val        | 478                  | 0.36                     |
| L20tumor     | <i>TP53</i>   | 7157           | 17         | 7578427        | 7578427      | missense_variant        | SNP          | T   | C   | .           | 5 11     | c.503A>G    | p.His168Arg        | 802                  | 0.747                    |
| L21tumor     | -             |                |            |                |              |                         |              |     |     |             |          |             |                    |                      |                          |
| L22tumor     | <i>TP53</i>   | 7157           | 17         | 7577548        | 7577548      | missense_variant        | SNP          | C   | A   | .           | 7 11     | c.733G>T    | p.Gly245Cys        | 1355                 | 0.646                    |
| L22tumor     | <i>TP53</i>   | 7157           | 17         | 7577559        | 7577559      | missense_variant        | SNP          | G   | A   | rs28934573  | 7 11     | c.722C>T    | p.Ser241Phe        | 1346                 | 0.649                    |
| L22tumor     | <i>CDKN2A</i> | 1029           | 9          | 21971092       | 21971092     | missense_variant        | SNP          | C   | A   | .           | 2 3      | c.266G>T    | p.Gly89Val         | 1425                 | 0.623                    |
| L23tumor     | <i>TP53</i>   | 7157           | 17         | 7579381        | 7579381      | frameshift_variant      | DEL          | G   | -   | .           | 4 11     | c.306delC   | p.Tyr103ThrfsTer20 | 2656                 | 0.218                    |

| Sample_ID | Gene_Name     | Entrez_Gene_ID | Chromosome | Start_position | End_position | Variant_Classification | Variant_Type | Ref | Alt | dbSNP_RS    | Exon_num | cDNA_Change       | Protein_Change     | Tumor_mutation_depth | Tumor_mutation_frequency |
|-----------|---------------|----------------|------------|----------------|--------------|------------------------|--------------|-----|-----|-------------|----------|-------------------|--------------------|----------------------|--------------------------|
| L23tumor  | <i>CTNNB1</i> | 1499           | 3          | 41266101       | 41266101     | missense_variant       | SNP          | C   | T   | .           | 3 15     | c.98C>T           | p.Ser33Phe         | 3434                 | 0.093                    |
| L24tumor  | <i>TP53</i>   | 7157           | 17         | 7578542        | 7578543      | frameshift_variant     | DEL          | GG  | -   | .           | 5 11     | c.387_388delCC    | p.Leu130GlnfsTer18 | 5032                 | 0.132                    |
| L24tumor  | <i>ARID2</i>  | 196528         | 12         | 46244658       | 46244658     | frameshift_variant     | DEL          | C   | -   | .           | 15 21    | c.2753delC        | p.Pro918HisfsTer9  | 6061                 | 0.196                    |
| L24tumor  | <i>ARID2</i>  | 196528         | 12         | 46287503       | 46287503     | stop_gained            | SNP          | A   | T   | .           | 20 21    | c.5362A>T         | p.Arg1788Ter       | 1548                 | 0.14                     |
| L24tumor  | <i>KIT</i>    | 3815           | 4          | 55589794       | 55589794     | missense_variant       | SNP          | C   | A   | rs75806183  | 8 21     | c.1276C>A         | p.Leu426Ile        | 2759                 | 0.188                    |
| L25tumor  | <i>TP53</i>   | 7157           | 17         | 7578523        | 7578523      | missense_variant       | SNP          | T   | G   | .           | 5 11     | c.407A>C          | p.Gln136Pro        | 1047                 | 0.25                     |
| L26tumor  | <i>RBI</i>    | 5925           | 13         | 48881489       | 48881489     | stop_gained            | SNP          | A   | T   | .           | 2 27     | c.211A>T          | p.Arg71Ter         | 969                  | 0.498                    |
| L26tumor  | <i>RBI</i>    | 5925           | 13         | 48881499       | 48881499     | missense_variant       | SNP          | C   | G   | rs764472420 | 2 27     | c.221C>G          | p.Ala74Gly         | 1037                 | 0.503                    |
| L26tumor  | <i>TP53</i>   | 7157           | 17         | 7572986        | 7572986      | stop_gained            | SNP          | G   | A   | .           | 11 11    | c.1123C>T         | p.Gln375Ter        | 1498                 | 0.377                    |
| L27tumor  | <i>TP53</i>   | 7157           | 17         | 7579358        | 7579358      | missense_variant       | SNP          | C   | A   | .           | 4 11     | c.329G>T          | p.Arg110Leu        | 1268                 | 0.227                    |
| L27tumor  | <i>CTNNB1</i> | 1499           | 3          | 41266098       | 41266098     | missense_variant       | SNP          | A   | G   | .           | 3 15     | c.95A>G           | p.Asp32Gly         | 2577                 | 0.098                    |
| L28tumor  | -             |                |            |                |              |                        |              |     |     |             |          |                   |                    |                      |                          |
| L29tumor  | <i>ZFH3</i>   | 463            | 16         | 72822563       | 72822564     | inframe_insertion      | INS          | -   | TGC | rs376311468 | 10 10    | c.9609_9611dupGCA | p.Gln3204dup       | 25                   | 0.2                      |
| L29tumor  | <i>TSC2</i>   | 7249           | 16         | 2134572        | 2134572      | missense_variant       | SNP          | C   | G   | rs45517338  | 34 42    | c.4349C>G         | p.Pro1450Arg       | 2363                 | 0.515                    |
| L29tumor  | <i>TP53</i>   | 7157           | 17         | 7577579        | 7577579      | stop_gained            | SNP          | G   | T   | .           | 7 11     | c.702C>A          | p.Tyr234Ter        | 1267                 | 0.37                     |
| L29tumor  | <i>CTNNB1</i> | 1499           | 3          | 41266097       | 41266097     | missense_variant       | SNP          | G   | C   | .           | 3 15     | c.94G>C           | p.Asp32His         | 2178                 | 0.294                    |
| L29tumor  | <i>ATR3</i>   | 546            | X          | 76938208       | 76938208     | missense_variant       | SNP          | A   | G   | rs45624939  | 9 35     | c.2540T>C         | p.Phe847Ser        | 724                  | 0.99                     |
| L30tumor  | <i>TSC2</i>   | 7249           | 16         | 2134598        | 2134598      | stop_gained            | SNP          | C   | T   | rs397514959 | 34 42    | c.4375C>T         | p.Arg1459Ter       | 3025                 | 0.03                     |
| L30tumor  | <i>TP53</i>   | 7157           | 17         | 7578524        | 7578524      | missense_variant       | SNP          | G   | C   | .           | 5 11     | c.406C>G          | p.Gln136Glu        | 1722                 | 0.157                    |
| L31tumor  | <i>TP53</i>   | 7157           | 17         | 7578457        | 7578457      | missense_variant       | SNP          | C   | A   | rs587782144 | 5 11     | c.473G>T          | p.Arg158Leu        | 2484                 | 0.126                    |

| Sample_ID | Gene_Name | Entrez_Gene_ID | Chromosome | Start_position | End_position | Variant_Classification  | Variant_Type | Ref        | Alt | dbSNP_RS        | Exon_num | cDNA_Change               | Protein_Change       | Tumor_depth | Tumor_mutation_frequency |
|-----------|-----------|----------------|------------|----------------|--------------|-------------------------|--------------|------------|-----|-----------------|----------|---------------------------|----------------------|-------------|--------------------------|
| L32tumor  | ARID1A    | 8289           | 1          | 27092770       | 27092776     | frameshift_variant      | DEL          | GGA<br>CAA | -   | .               | 9 20     | c.2794_2800delCAA<br>GGGA | p.Gln932LeufsTer7    | 3124        | 0.218                    |
| L32tumor  | ARID1A    | 8289           | 1          | 27100161       | 27100161     | frameshift_variant      | DEL          | T          | -   | .               | 16 20    | c.3958delT                | p.Ser1320LeufsTer161 | 3497        | 0.268                    |
| L32tumor  | CTNNB1    | 1499           | 3          | 41266098       | 41266098     | missense_variant        | SNP          | A          | G   | .               | 3 15     | c.95A>G                   | p.Asp32Gly           | 2413        | 0.298                    |
| L32tumor  | TERT      | .              | 5          | 1295228        | 1295228      | upstream_gene_variant   | SNP          | G          | A   | .               | N A      | .                         | .                    | 137         | 0.228                    |
| L32tumor  | CDKN2A    | 1029           | 9          | 21971209       | 21971209     | splice_acceptor_variant | SNP          | T          | A   | .               | 2 3      | c.151-2A>T                | .                    | 1415        | 0.3                      |
| L33tumor  | TP53      | 7157           | 17         | 7578211        | 7578211      | missense_variant        | SNP          | C          | G   | .               | 6 11     | c.638G>C                  | p.Arg213Pro          | 1634        | 0.362                    |
| L33tumor  | TERT      | .              | 5          | 1295228        | 1295228      | upstream_gene_variant   | SNP          | G          | A   | .               | N A      | .                         | .                    | 284         | 0.241                    |
| L33tumor  | BAI3      | 577            | 6          | 69653817       | 69653817     | stop_gained             | SNP          | C          | T   | .               | 6 32     | c.1126C>T                 | p.Gln376Ter          | 2833        | 0.041                    |
| L34tumor  | TERT      | .              | 5          | 1295228        | 1295228      | upstream_gene_variant   | SNP          | G          | A   | .               | N A      | .                         | .                    | 250         | 0.412                    |
| L34tumor  | MEN1      | 4221           | 11         | 64577373       | 64577373     | missense_variant        | SNP          | T          | G   | .               | 2 10     | c.209A>C                  | p.Asp70Ala           | 1923        | 0.028                    |
| L34tumor  | ARID1A    | 8289           | 1          | 27022940       | 27022942     | inframe_deletion        | DEL          | CCG        | -   | rs74808521<br>4 | 1 20     | c.60_62delGCC             | p.Pro21del           | 534         | 0.032                    |
| L34tumor  | ARID1A    | 8289           | 1          | 27100182       | 27100184     | inframe_deletion        | DEL          | GCA        | -   | rs37456488<br>9 | 16 20    | c.3999_4001delGCA         | p.Gln1334del         | 3127        | 0.048                    |
| L34tumor  | TP53      | 7157           | 17         | 7577536        | 7577536      | missense_variant        | SNP          | T          | A   | rs58778208<br>2 | 7 11     | c.745A>T                  | p.Arg249Trp          | 1343        | 0.701                    |
| L34tumor  | SETD2     | 29072          | 3          | 47125632       | 47125632     | stop_gained             | SNP          | T          | A   | .               | 12 21    | c.5638A>T                 | p.Arg1880Ter         | 2733        | 0.412                    |
| L34tumor  | SETD2     | 29072          | 3          | 47125834       | 47125834     | missense_variant        | SNP          | T          | A   | .               | 12 21    | c.5436A>T                 | p.Lys1812Asn         | 1834        | 0.089                    |
| L34tumor  | BAI3      | 577            | 6          | 69348580       | 69348580     | missense_variant        | SNP          | C          | A   | rs75918974<br>4 | 3 32     | c.13C>A                   | p.Arg5Ser            | 1505        | 0.461                    |
| L34tumor  | BAI1      | 575            | 8          | 143545614      | 143545616    | inframe_deletion        | DEL          | CTG        | -   | rs77700015<br>1 | 1 30     | c.70_72delCTG             | p.Leu24del           | 660         | 0.058                    |
| L34tumor  | ATRX      | 546            | X          | 76907782       | 76907784     | inframe_deletion        | DEL          | TCC        | -   | rs39812342<br>3 | 15 35    | c.4377_4379delGGA         | p.Glu1464del         | 1084        | 0.037                    |
| L34tumor  | TP53      | 7157           | 17         | 7578527        | 7578527      | missense_variant        | SNP          | A          | G   | .               | 5 11     | c.403T>C                  | p.Cys135Arg          | 2116        | 0.01                     |



| Sample_ID | Gene_Name | Entrez_Gene_ID | Chromosome | Start_position | End_position | Variant_Classification  | Variant_Type | Ref | Alt | dbSNP_RS    | Exon_num | cDNA_Change       | Protein_Change     | Tumor_depth | Tumor_mutation_frequency |
|-----------|-----------|----------------|------------|----------------|--------------|-------------------------|--------------|-----|-----|-------------|----------|-------------------|--------------------|-------------|--------------------------|
| L35tumor  | ARID1A    | 8289           | 1          | 27023221       | 27023222     | frameshift_variant      | DEL          | TA  | -   | .           | 1 20     | c.327_328delTA    | p.Arg110AlafsTer6  | 238         | 0.366                    |
| L36tumor  | TERT      | .              | 5          | 1295228        | 1295228      | upstream_gene_variant   | SNP          | G   | A   | .           | N A      | .                 | .                  | 200         | 0.177                    |
| L36tumor  | AXINI     | 8312           | 16         | 338187         | 338187       | missense_variant        | SNP          | C   | G   | .           | 11 11    | c.2524G>C         | p.Glu842Gln        | 3555        | 0.03                     |
| L38tumor  | TERT      | .              | 5          | 1295228        | 1295228      | upstream_gene_variant   | SNP          | G   | A   | .           | N A      | .                 | .                  | 247         | 0.272                    |
| L39tumor  | TSC2      | 7249           | 16         | 2105465        | 2105465      | missense_variant        | SNP          | A   | T   | .           | 6 42     | c.544A>T          | p.Asn182Tyr        | 1499        | 0.087                    |
| L39tumor  | TERT      | .              | 5          | 1295228        | 1295228      | upstream_gene_variant   | SNP          | G   | A   | .           | N A      | .                 | .                  | 285         | 0.11                     |
| L39tumor  | BAI3      | 577            | 6          | 69653740       | 69653740     | missense_variant        | SNP          | A   | T   | .           | 6 32     | c.1049A>T         | p.Glu350Val        | 2885        | 0.09                     |
| L3tumor   | -         |                |            |                |              |                         |              |     |     |             |          |                   |                    |             |                          |
| L40tumor  | TP53      | 7157           | 17         | 7579400        | 7579400      | frameshift_variant      | DEL          | G   | -   | .           | 4 11     | c.287delC         | p.Ser96LeufsTer27  | 3857        | 0.364                    |
| L40tumor  | TERT      | .              | 5          | 1295228        | 1295228      | upstream_gene_variant   | SNP          | G   | A   | .           | N A      | .                 | .                  | 339         | 0.24                     |
| L40tumor  | TRIM26    | 7726           | 6          | 30154123       | 30154123     | stop_gained             | SNP          | C   | A   | .           | 10 10    | c.1150G>T         | p.Glu384Ter        | 88          | 0.193                    |
| L40tumor  | TPRN      | 286262         | 9          | 140087008      | 140087008    | missense_variant        | SNP          | C   | T   | rs746612209 | 2 4      | c.1861G>A         | p.Glu621Lys        | 54          | 0.208                    |
| L43tumor  | ARID1A    | 8289           | 1          | 27100182       | 27100184     | inframe_deletion        | DEL          | GCA | -   | rs374564889 | 16 20    | c.3999_4001delGCA | p.Gln1334del       | 3710        | 0.036                    |
| L43tumor  | ARID1A    | 8289           | 1          | 27022940       | 27022942     | inframe_deletion        | DEL          | CCG | -   | rs748085214 | 1 20     | c.60_62delGCC     | p.Pro21del         | 713         | 0.03                     |
| L43tumor  | TSC2      | 7249           | 16         | 2131788        | 2131788      | missense_variant        | SNP          | G   | A   | rs200577441 | 31 42    | c.3803G>A         | p.Arg1268His       | 1324        | 0.468                    |
| L43tumor  | AXINI     | 8312           | 16         | 354422         | 354422       | frameshift_variant      | DEL          | T   | -   | .           | 5 11     | c.1136delA        | p.Lys379ArgfsTer35 | 4106        | 0.025                    |
| L43tumor  | BAIL      | 575            | 8          | 143545614      | 143545616    | inframe_deletion        | DEL          | CTG | -   | rs777000151 | 1 30     | c.70_72delCTG     | p.Leu24del         | 788         | 0.052                    |
| L47tumor  | AXINI     | 8312           | 16         | 339477         | 339477       | stop_gained             | SNP          | G   | A   | .           | 10 11    | c.2425C>T         | p.Gln809Ter        | 702         | 0.17                     |
| L47tumor  | AXINI     | 8312           | 16         | 360071         | 360071       | splice_acceptor_variant | SNP          | T   | A   | rs777975737 | 4 11     | c.1020-2A>T       | .                  | 521         | 0.175                    |
| L47tumor  | SMARCA4   | 6597           | 19         | 11152230       | 11152230     | missense_variant        | SNP          | A   | T   | .           | 31 36    | c.4418A>T         | p.Lys1473Met       | 496         | 0.134                    |

| Sample_ID     | Gene_Name     | Entrez_Gene_ID | Chromosome | Start_position | End_position | Variant_Classification  | Variant_Type | Ref                                                                                          | Alt | dbSNP_RS    | Exon_number | cDNA_Change                                                           | Protein_Change | Tumor_mutation_depth | Tumor_mutation_frequency |
|---------------|---------------|----------------|------------|----------------|--------------|-------------------------|--------------|----------------------------------------------------------------------------------------------|-----|-------------|-------------|-----------------------------------------------------------------------|----------------|----------------------|--------------------------|
| L48tumor      | <i>CDKN2A</i> | 1029           | 9          | 21971111       | 21971111     | missense_variant        | SNP          | G                                                                                            | A   | .           | 2 3         | c.247C>T                                                              | p.His83Tyr     | 229                  | 0.279                    |
| L48tumor      | <i>ARID2</i>  | 196528         | 12         | 46285881       | 46285881     | splice_donor_variant    | SNP          | T                                                                                            | C   | .           | 18 21       | c.5147+2T>C                                                           | .              | 208                  | 0.226                    |
| L48tumor      | <i>TP53</i>   | 7157           | 17         | 7578395        | 7578395      | missense_variant        | SNP          | G                                                                                            | T   | rs587780070 | 5 11        | c.535C>A                                                              | p.His179Asn    | 100                  | 0.3                      |
| L49T re-tumor | <i>ARID1A</i> | 8289           | 1          | 27106106       | 27106106     | missense_variant        | SNP          | G                                                                                            | C   | rs41303631  | 20 20       | c.5717G>C                                                             | p.Arg1906Pro   | 637                  | 0.495                    |
| L49T re-tumor | <i>TP53</i>   | 7157           | 17         | 7579592        | 7579592      | splice_acceptor_variant | SNP          | T                                                                                            | A   | .           | 4 11        | c.97-2A>T                                                             | .              | 460                  | 0.243                    |
| L49T re-tumor | <i>TERT</i>   | .              | 5          | 1295228        | 1295228      | upstream_gene_variant   | SNP          | G                                                                                            | A   | .           | N A         | .                                                                     | .              | 103                  | 0.235                    |
| L49tumor      | <i>ARID1A</i> | 8289           | 1          | 27106106       | 27106106     | missense_variant        | SNP          | G                                                                                            | C   | rs41303631  | 20 20       | c.5717G>C                                                             | p.Arg1906Pro   | 3888                 | 0.779                    |
| L49tumor      | <i>TP53</i>   | 7157           | 17         | 7579592        | 7579592      | splice_acceptor_variant | SNP          | T                                                                                            | A   | .           | 4 11        | c.97-2A>T                                                             | .              | 2475                 | 0.568                    |
| L49tumor      | <i>TERT</i>   | .              | 5          | 1295228        | 1295228      | upstream_gene_variant   | SNP          | G                                                                                            | A   | .           | N A         | .                                                                     | .              | 952                  | 0.449                    |
| L4tumor       | <i>TSC2</i>   | 7249           | 16         | 2108746        | 2108746      | splice_acceptor_variant | SNP          | A                                                                                            | C   | rs45517134  | 10 42       | c.849-2A>C                                                            | .              | 469                  | 0.301                    |
| L4tumor       | <i>BAI3</i>   | 577            | 6          | 70048857       | 70048857     | missense_variant        | SNP          | G                                                                                            | C   | .           | 25 32       | c.3238G>C                                                             | p.Gly1080Arg   | 1761                 | 0.182                    |
| L50tumor      | <i>AXINI</i>  | 8312           | 16         | 354414         | 354453       | splice_acceptor_variant | DEL          | GGA<br>CCT<br>CCT<br>TCG<br>GCA<br>CCC<br>GGT<br>ACG<br>TGC<br>GCT<br>GCG<br>AGG<br>GAC<br>A | -   | .           | 5 11        | c.1117-12_1144delTGTCC<br>CTCGCAGCGCAC<br>GTACCGGGTGCC<br>GAAGGAGGTCC | .              | 5819                 | 0.032                    |



| Sample_ID  | Gene_Name      | Entrez_Gene_ID | Chromosome | Start_position | End_position | Variant_Classification | Variant_Type | Ref | Alt             | dbSNP_RS    | Exon_num | cDNA_Change             | Protein_Change          | Tumor_depth | Tumor_mutation_frequency |
|------------|----------------|----------------|------------|----------------|--------------|------------------------|--------------|-----|-----------------|-------------|----------|-------------------------|-------------------------|-------------|--------------------------|
| L62Tumor   | <i>ARID1A</i>  | 8289           | 1          | 27023601       | 27023602     | frameshift_variant     | INS          | -   | TGG<br>CAC<br>T | .           | 1 20     | c.708_714dupTGGC<br>ACT | p.Pro239Trpfs<br>Ter163 | 2141        | 0.331                    |
| L62Tumor   | <i>ARID1A</i>  | 8289           | 1          | 27107135       | 27107136     | frameshift_variant     | INS          | -   | A               | .           | 20 20    | c.6747dupA              | p.Glu2250Argfs<br>Ter28 | 4146        | 0.368                    |
| L62Tumor   | <i>ZFH3</i>    | 463            | 16         | 72822563       | 72822564     | inframe_insertion      | INS          | -   | TGC             | rs376311468 | 10 10    | c.9609_9611dupGC<br>A   | p.Gln3204dup            | 45          | 0.244                    |
| L62L1tumor | <i>SMARCA4</i> | 6597           | 19         | 11143973       | 11143973     | missense_variant       | SNP          | A   | T               | .           | 27 36    | c.3554A>T               | p.Gln1185Leu            | 1060        | 0.253                    |
| L62L1tumor | <i>CTNNB1</i>  | 1499           | 3          | 41266104       | 41266104     | missense_variant       | SNP          | G   | T               | rs28931589  | 3 15     | c.101G>T                | p.Gly34Val              | 2790        | 0.361                    |
| L62L1tumor | <i>TERT</i>    | .              | 5          | 1295228        | 1295228      | upstream_gene_variant  | SNP          | G   | A               | .           | N A      | .                       | .                       | 313         | 0.26                     |
| L63tumor   | <i>TERT</i>    | .              | 5          | 1295228        | 1295228      | upstream_gene_variant  | SNP          | G   | A               | .           | N A      | .                       | .                       | 162         | 0.21                     |
| L63tumor   | <i>ARID1A</i>  | 8289           | 1          | 27022940       | 27022942     | inframe_deletion       | DEL          | CCG | -               | rs748085214 | 1 20     | c.60_62delGCC           | p.Pro21del              | 413         | 0.027                    |
| L63tumor   | <i>ARID1A</i>  | 8289           | 1          | 27100182       | 27100184     | inframe_deletion       | DEL          | GCA | -               | rs374564889 | 16 20    | c.3999_4001delGCA       | p.Gln1334del            | 2273        | 0.038                    |
| L63tumor   | <i>TP53</i>    | 7157           | 17         | 7578206        | 7578206      | missense_variant       | SNP          | T   | C               | .           | 6 11     | c.643A>G                | p.Ser215Gly             | 932         | 0.242                    |
| L63tumor   | <i>SMARCA4</i> | 6597           | 19         | 11145716       | 11145718     | inframe_deletion       | DEL          | GAG | -               | rs148514235 | 30 36    | c.4090_4092delGAG       | p.Glu1364del            | 1772        | 0.02                     |
| L63tumor   | <i>SETD2</i>   | 29072          | 3          | 47164775       | 47164775     | missense_variant       | SNP          | T   | C               | .           | 3 21     | c.1351A>G               | p.Thr451Ala             | 1427        | 0.079                    |
| L63tumor   | <i>BAT1</i>    | 575            | 8          | 143545614      | 143545616    | inframe_deletion       | DEL          | CTG | -               | rs777000151 | 1 30     | c.70_72delCTG           | p.Leu24del              | 362         | 0.061                    |
| L64tumor   | <i>ARID1A</i>  | 8289           | 1          | 27101382       | 27101382     | missense_variant       | SNP          | A   | C               | .           | 18 20    | c.4664A>C               | p.Tyr1555Ser            | 1518        | 0.02                     |
| L64tumor   | <i>TP53</i>    | 7157           | 17         | 7579432        | 7579432      | frameshift_variant     | DEL          | A   | -               | rs775515332 | 4 11     | c.255delT               | p.Ala86Hisfs<br>Ter37   | 1010        | 0.025                    |
| L69tumor   | <i>TP53</i>    | 7157           | 17         | 7578263        | 7578263      | missense_variant       | SNP          | G   | C               | .           | 6 11     | c.586C>G                | p.Arg196Gly             | 2411        | 0.22                     |







**Table S4. Tumor mutations detected in corresponding CTCs**

|     | Gene          | Chromosome | Start position | End position | Ref | Alt | dbSNP RS    | Exon num | CTC site | Consistency with tumor | Positive ratio(%) |
|-----|---------------|------------|----------------|--------------|-----|-----|-------------|----------|----------|------------------------|-------------------|
| L1  | <i>CTNNB1</i> | 3          | 41266101       | 41266101     | C   | G   | .           | 3 15     | CG       | YES                    | 14.86697966       |
| L2  | <i>CTNNB1</i> | 3          | 41266098       | 41266098     | A   | G   | .           | 3 15     | AG       | YES                    | 8.016032064       |
| L2  | <i>BAIL</i>   | 8          | 143563046      | 143563046    | T   | C   | .           | 10 30    | CT       | YES                    | 13.76811594       |
| L2  | <i>ARID2</i>  | 12         | 46285594       | 46285594     | C   | T   | .           | 17 21    | CT       | YES                    | 15.30864198       |
| L2  | <i>TP53</i>   | 17         | 7578268        | 7578268      | A   | C   | .           | 6 11     | AC       | YES                    | 19.01041667       |
| L4  | <i>TSC2</i>   | 16         | 2108746        | 2108746      | A   | C   | rs45517134  | 10 42    | AC       | YES                    | 30.45454545       |
| L4  | <i>BAI3</i>   | 6          | 70048857       | 70048857     | G   | C   | .           | 25 32    | GC       | YES                    | 12.92035398       |
| L7  | <i>TP53</i>   | 17         | 7576927        | 7576927      | C   | T   | rs587781702 | 9 11     | CT       | YES                    | 32.33944954       |
| L7  | <i>TERT</i>   | 5          | 1295228        | 1295228      | G   | A   | .           | N A      | GA       | YES                    | 43.47826087       |
| L8  | <i>AXINI</i>  | 16         | 347983         | 347983       | C   | -   | rs760961378 | 6 11     | CC       | NO                     | 0                 |
| L11 | <i>ARID2</i>  | 12         | 46245589       | 46245589     | C   | A   | .           | 15 21    | CC       | NO                     | 0                 |
| L11 | <i>TP53</i>   | 17         | 7578403        | 7578403      | C   | A   | .           | 5 11     | CA       | YES                    | 53.53016688       |
| L12 | <i>TP53</i>   | 17         | 7577580        | 7577580      | T   | C   | rs587780073 | 7 11     | CT       | YES                    | 82.73244782       |
| L15 | <i>ARID1A</i> | 1          | 27023052       | 27023052     | C   | A   | .           | 1 20     | CC       | NO                     | 0                 |
| L15 | <i>BAIL</i>   | 8          | 143592291      | 143592291    | A   | C   | .           | 17 30    | NA       | NA                     | NA                |
| L15 | <i>BAIL</i>   | 8          | 143623763      | 143623763    | G   | C   | .           | 27 30    | NA       | NA                     | NA                |
| L15 | <i>CTNNB1</i> | 3          | 41274859       | 41274859     | T   | G   | .           | 8 15     | TT       | NO                     | 0                 |
| L15 | <i>TP53</i>   | 17         | 7577098        | 7577098      | T   | A   | .           | 8 11     | TT       | NO                     | 0                 |
| L16 | <i>TP53</i>   | 17         | 7577534        | 7577534      | C   | A   | rs28934571  | 7 11     | CA       | YES                    | 11.51385928       |
| L17 | <i>RBI</i>    | 13         | 48916733       | 48916733     | A   | T   | .           | 3 27     | AA       | NO                     | 0                 |
| L17 | <i>RBI</i>    | 13         | 49037866       | 49037866     | G   | T   | rs587778860 | 21 27    | GT       | YES                    | 16.23931624       |
| L17 | <i>TERT</i>   | 5          | 1295228        | 1295228      | G   | A   | .           | N A      | NA       | NA                     | NA                |
| L18 | <i>RBI</i>    | 13         | 48934227       | 48934227     | A   | T   | .           | 7 27     | AA       | NO                     | 0                 |
| L20 | <i>ARID1A</i> | 1          | 27023883       | 27023883     | C   | T   | .           | 1 20     | CT       | YES                    | 54.84693878       |
| L20 | <i>TP53</i>   | 17         | 7578427        | 7578427      | T   | C   | .           | 5 11     | TC       | YES                    | 75.64766839       |
| L22 | <i>TP53</i>   | 17         | 7577548        | 7577548      | C   | A   | .           | 7 11     | CA       | YES                    | 9.108910891       |
| L22 | <i>TP53</i>   | 17         | 7577559        | 7577559      | G   | A   | rs28934573  | 7 11     | GA       | YES                    | 67.83088235       |
| L22 | <i>CDKN2A</i> | 9          | 21971092       | 21971092     | C   | A   | .           | 2 3      | CA       | YES                    | 17.74647887       |



| Gene              | Chromosome | Start position | End position | Ref   | Alt | dbSNP RS    | Exon num | CTC site | Consistency with tumor | Positive ratio(%) |
|-------------------|------------|----------------|--------------|-------|-----|-------------|----------|----------|------------------------|-------------------|
| L23 <i>TP53</i>   | 17         | 7579381        | 7579381      | G     | -   | .           | 4 11     | G/-      | YES                    | 50                |
| L23 <i>CTNNB1</i> | 3          | 41266101       | 41266101     | C     | T   | .           | 3 15     | CT       | YES                    | 7.105719237       |
| L24 <i>TP53</i>   | 17         | 7578542        | 7578543      | GG    | -   | .           | 5 11     | GG/-     | YES                    | 50                |
| L24 <i>ARID2</i>  | 12         | 46244658       | 46244658     | C     | -   | .           | 15 21    | C/-      | YES                    | 50                |
| L24 <i>ARID2</i>  | 12         | 46287503       | 46287503     | A     | T   | .           | 20 21    | AT       | YES                    | 84.32539683       |
| L24 <i>KIT</i>    | 4          | 55589794       | 55589794     | C     | A   | rs758061831 | 8 21     | CC       | NO                     | 0                 |
| L25 <i>TP53</i>   | 17         | 7578523        | 7578523      | T     | G   | .           | 5 11     | TG       | YES                    | 22.5950783        |
| L27 <i>TP53</i>   | 17         | 7579358        | 7579358      | C     | A   | .           | 4 11     | CA       | YES                    | 19.88304094       |
| L27 <i>CTNNB1</i> | 3          | 41266098       | 41266098     | A     | G   | .           | 3 15     | AG       | YES                    | 11.15618661       |
| L29 <i>CTNNB1</i> | 3          | 41266097       | 41266097     | G     | A   | .           | 3 15     | GA       | YES                    | 17.5313059        |
| L29 <i>ATRX</i>   | X          | 76938208       | 76938208     | A     | G   | rs45624939  | 9 35     | AG       | YES                    | 5.722070845       |
| L29 <i>ZFH3</i>   | 16         | 72822563       | 72822564     | -     | TGC | rs376311468 | 10 10    | TGC/-    | YES                    | 50                |
| L29 <i>TSC2</i>   | 16         | 2134572        | 2134572      | C     | G   | rs45517338  | 34 42    | CC       | NO                     | 0                 |
| L29 <i>TP53</i>   | 17         | 7577579        | 7577579      | G     | T   | .           | 7 11     | NA       | NA                     | NA                |
| L30 <i>TSC2</i>   | 16         | 2134598        | 2134598      | C     | T   | rs397514959 | 34 42    | CC       | NO                     | 0                 |
| L30 <i>TP53</i>   | 17         | 7578524        | 7578524      | G     | C   | .           | 5 11     | GC       | YES                    | 16                |
| L31 <i>TP53</i>   | 17         | 7578457        | 7578457      | C     | A   | rs587782144 | 5 11     | CA       | YES                    | 19.0376569        |
| L32 <i>CTNNB1</i> | 3          | 41266098       | 41266098     | A     | G   | .           | 3 15     | AG       | YES                    | 24.50805009       |
| L32 <i>TERT</i>   | 5          | 1295228        | 1295228      | G     | A   | .           | N A      | GA       | YES                    | 32.98755187       |
| L32 <i>ARID1A</i> | 1          | 27092770       | 27092776     | GGA(- | -   | .           | 9 20     | GACAAC   | YES                    | 50                |
| L32 <i>ARID1A</i> | 1          | 27100161       | 27100161     | T     | -   | .           | 16 20    | T/-      | YES                    | 50                |
| L32 <i>CDKN2A</i> | 9          | 21971209       | 21971209     | T     | A   | .           | 2 3      | TA       | YES                    | 35.79881657       |
| L33 <i>TP53</i>   | 17         | 7578211        | 7578211      | C     | G   | .           | 6 11     | CG       | YES                    | 34.19811321       |
| L33 <i>TERT</i>   | 5          | 1295228        | 1295228      | G     | A   | .           | N A      | GA       | YES                    | 34.34343434       |
| L33 <i>BAI3</i>   | 6          | 69653817       | 69653817     | C     | T   | .           | 6 32     | CC       | NO                     | 0                 |
| L34 <i>TERT</i>   | 5          | 1295228        | 1295228      | G     | A   | .           | N A      | GA       | YES                    | 43.06418219       |
| L34 <i>MEN1</i>   | 11         | 64577373       | 64577373     | T     | G   | .           | 2 10     | TT       | NO                     | 0                 |
| L34 <i>ARID1A</i> | 1          | 27022940       | 27022942     | CCG   | -   | rs748085214 | 1 20     | CCG/CCC  | NO                     | 0                 |
| L34 <i>ARID1A</i> | 1          | 27100182       | 27100184     | GCA   | -   | rs374564889 | 16 20    | GCA      | NO                     | 0                 |

| Gene              | Chromosome | Start position | End position | Ref | Alt | dbSNP RS    | Exon num | CTC site | Consistency with tumor | Positive ratio(%) |
|-------------------|------------|----------------|--------------|-----|-----|-------------|----------|----------|------------------------|-------------------|
| L34 <i>TP53</i>   | 17         | 7577536        | 7577536      | T   | A   | rs587782082 | 7 11     | TA       | YES                    | 64.1509434        |
| L34 <i>SETD2</i>  | 3          | 47125632       | 47125632     | T   | A   | .           | 12 21    | AT       | YES                    | 35.52036199       |
| L34 <i>SETD2</i>  | 3          | 47125834       | 47125834     | T   | A   | .           | 12 21    | AT       | YES                    | 8.586762075       |
| L34 <i>BAI3</i>   | 6          | 69348580       | 69348580     | C   | A   | rs759189744 | 3 32     | AC       | YES                    | 15.19507187       |
| L34 <i>BAIL</i>   | 8          | 143545614      | 143545616    | CTG | -   | rs777000151 | 1 30     | CTG/CTG  | NO                     | 0                 |
| L34 <i>ATRX</i>   | X          | 76907782       | 76907784     | TCC | -   | rs398123423 | 15 35    | TCC/TCC  | NO                     | 0                 |
| L34 <i>TP53</i>   | 17         | 7578527        | 7578527      | A   | G   | .           | 5 11     | AA       | NO                     | 0                 |
| L35 <i>ARID1A</i> | 1          | 27023221       | 27023222     | TA  | -   | .           | 1 20     | TA/-     | YES                    | 50                |
| L36 <i>TERT</i>   | 5          | 1295228        | 1295228      | G   | A   | .           | N A      | GA       | YES                    | 23.42857143       |
| L36 <i>AXINI</i>  | 16         | 338187         | 338187       | C   | G   | .           | 11 11    | CC       | NO                     | 0                 |
| L38 <i>TERT</i>   | 5          | 1295228        | 1295228      | G   | A   | .           | N A      | GA       | YES                    | 30.75313808       |
| L39 <i>TSC2</i>   | 16         | 2105465        | 2105465      | A   | T   | .           | 6 42     | AA       | NO                     | 0                 |
| L39 <i>TERT</i>   | 5          | 1295228        | 1295228      | G   | A   | .           | N A      | GA       | YES                    | 18.00766284       |
| L39 <i>BAI3</i>   | 6          | 69653740       | 69653740     | A   | T   | .           | 6 32     | AT       | YES                    | 7.992202729       |
| L43 <i>ARID1A</i> | 1          | 27100182       | 27100184     | GCA | -   | rs374564889 | 16 20    | GCA/GCA  | NO                     | 0                 |
| L43 <i>ARID1A</i> | 1          | 27022940       | 27022942     | CCG | -   | rs748085214 | 1 20     | CCG/CCG  | NO                     | 0                 |
| L43 <i>TSC2</i>   | 16         | 2131788        | 2131788      | G   | A   | rs200577441 | 31 42    | GA       | YES                    | 59.45273632       |
| L43 <i>AXINI</i>  | 16         | 354422         | 354422       | T   | -   | .           | 5 11     | TT       | NO                     | 0                 |
| L43 <i>BAIL</i>   | 8          | 143545614      | 143545616    | CTG | -   | rs777000151 | 1 30     | NA       | NA                     | NA                |
| L48 <i>CDKN2A</i> | 9          | 21971111       | 21971111     | G   | A   | AG          | 2 3      | GA       | YES                    | 17.30769231       |
| L48 <i>ARID2</i>  | 12         | 46285881       | 46285881     | T   | C   | .           | 18 21    | CT       | YES                    | 32.8011611        |
| L48 <i>TP53</i>   | 17         | 7578395        | 7578395      | G   | T   | rs587780070 | 5 11     | TG       | YES                    | 33.61227336       |
| L49 <i>ARID1A</i> | 1          | 27106106       | 27106106     | G   | C   | rs41303631  | 20 20    | GC       | YES                    | 19.8938992        |
| L49 <i>TP53</i>   | 17         | 7579592        | 7579592      | T   | A   | .           | 4 11     | TA       | YES                    | 37.11538462       |
| L49 <i>TERT</i>   | 5          | 1295228        | 1295228      | G   | A   | .           | N A      | GA       | YES                    | 46.62813102       |
| L52 <i>TP53</i>   | 17         | 7578475        | 7578475      | G   | A   | rs587782705 | 5 11     | GA       | YES                    | 21.2371134        |
| L53 <i>AXINI</i>  | 16         | 339468         | 339468       | C   | A   | .           | 10 11    | CA       | YES                    | 43.80530973       |
| L54 <i>BAI3</i>   | 6          | 69666035       | 69666035     | G   | C   | .           | 7 32     | GC       | YES                    | 14.44141689       |
| L54 <i>BAI3</i>   | 6          | 69348689       | 69348689     | C   | A   | rs745590202 | 3 32     | AC       | YES                    | 10                |

| Gene | Chromosome        | Start position | End position | Ref  | Alt  | dbSNP RS    | Exon num | CTC site | Consistency with tumor | Positive ratio(%) |
|------|-------------------|----------------|--------------|------|------|-------------|----------|----------|------------------------|-------------------|
| L54  | <i>ST6GALNAC1</i> | 77334277       | 77334282     | GCA  | C    | rs778440501 | 2 5      | NA       | NA                     | NA                |
| L55  | <i>RB1</i>        | 49047527       | 49047527     | G    | T    | rs587778850 | 24 27    | GG       | NO                     | 0                 |
| L55  | <i>TP53</i>       | 7577121        | 7577121      | G    | A    | .           | 8 11     | GG       | NO                     | 0                 |
| L55  | <i>TP53</i>       | 7577094        | 7577094      | G    | A    | .           | 8 11     | GG       | NO                     | 0                 |
| L59  | <i>CTNNB1</i>     | 41266136       | 41266136     | T    | C    | rs121913407 | 3 15     | CT       | YES                    | 47.2361809        |
| L59  | <i>ARID1A</i>     | 27100182       | 27100184     | GCA  | -    | rs374564889 | 16 20    | NA       | NA                     | NA                |
| L59  | <i>ARID1A</i>     | 27023451       | 27023453     | GCG  | -    | rs772367471 | 1 20     | GCG/GCC  | NO                     | 0                 |
| L59  | <i>BAIL</i>       | 143545614      | 143545616    | CTG  | -    | rs777000151 | 1 30     | CTG/CTG  | NO                     | 0                 |
| L59  | <i>ARID1A</i>     | 27022940       | 27022942     | CCG  | -    | rs748085214 | 1 20     | CCG/CCC  | NO                     | 0                 |
| L60  | <i>TP53</i>       | 7578188        | 7578188      | C    | A    | .           | 6 11     | CA       | YES                    | 46.84210526       |
| L62  | <i>ARID1A</i>     | 27023601       | 27023602     | -    | TGGC | .           | 1 20     | GGCACT   | YES                    | 50                |
| L62  | <i>ARID1A</i>     | 27107135       | 27107136     | -    | A    | .           | 20 20    | A/-      | YES                    | 50                |
| L62  | <i>ZFH3</i>       | 72822563       | 72822564     | -    | TGC  | rs376311468 | 10 10    | TGC/-    | YES                    | 50                |
| L62  | <i>SMARCA4</i>    | 11143973       | 11143973     | A    | T    | .           | 27 36    | AT       | YES                    | 34.7133758        |
| L62  | <i>CTNNB1</i>     | 41266104       | 41266104     | G    | T    | rs28931589  | 3 15     | GT       | YES                    | 30.65539112       |
| L62  | <i>TERT</i>       | 1295228        | 1295228      | G    | A    | .           | N A      | GA       | YES                    | 27.5142315        |
| L63  | <i>TERT</i>       | 1295228        | 1295228      | G    | A    | .           | N A      | GA       | YES                    | 22.60869565       |
| L63  | <i>ARID1A</i>     | 27022940       | 27022942     | CCG  | -    | rs748085214 | 1 20     | CCG/CCC  | NO                     | 0                 |
| L63  | <i>ARID1A</i>     | 27100182       | 27100184     | GCA  | -    | rs374564889 | 16 20    | GCA/GCA  | NO                     | 0                 |
| L63  | <i>TP53</i>       | 7578206        | 7578206      | T    | C    | .           | 6 11     | TC       | YES                    | 17.94258373       |
| L63  | <i>SMARCA4</i>    | 11145716       | 11145718     | GAG  | -    | rs148514235 | 30 36    | GAG/GAC  | NO                     | 0                 |
| L63  | <i>SETD2</i>      | 47164775       | 47164775     | T    | C    | .           | 3 21     | TT       | NO                     | 0                 |
| L63  | <i>BAIL</i>       | 143545614      | 143545616    | CTG  | -    | rs777000151 | 1 30     | CTG/CTG  | NO                     | 0                 |
| L64  | <i>TP53</i>       | 7579432        | 7579432      | A    | -    | rs775515332 | 4 11     | AA       | NO                     | 0                 |
| L64  | <i>ARID1A</i>     | 27101382       | 27101382     | A    | C    | .           | 18 20    | AA       | NO                     | 0                 |
| L64  | <i>RB1</i>        | 48878061       | 48878061     | A    | C    | .           | 1 27     | AA       | NO                     | 0                 |
| L69  | <i>TP53</i>       | 7578263        | 7578263      | G    | C    | .           | 6 11     | GC       | YES                    | 30.20527859       |
| L69  | <i>ARID1A</i>     | 27023853       | 27023877     | CCCA | -    | .           | 1 20     | NA       | NA                     | NA                |
| L69  | <i>CTNNB1</i>     | 41266113       | 41266113     | C    | T    | .           | 3 15     | CT       | YES                    | 20.07104796       |

| Gene              | Chromosome | Start position | End position | Ref | Alt | dbSNP RS    | Exon num | CTC site | Consistency with tumor | Positive ratio(%) |
|-------------------|------------|----------------|--------------|-----|-----|-------------|----------|----------|------------------------|-------------------|
| L69 <i>KIT</i>    | 4          | 55561756       | 55561756     | G   | A   | rs376469897 | 2 21     | AG       | YES                    | 19.28020566       |
| L69 <i>TERT</i>   | 5          | 1295228        | 1295228      | G   | A   | .           | N A      | GA       | YES                    | 29.01960784       |
| L70 <i>MEN1</i>   | 11         | 64577373       | 64577373     | T   | G   | .           | 2 10     | TT       | NO                     | 0                 |
| L70 <i>ARID2</i>  | 12         | 46246488       | 46246488     | G   | T   | rs761166036 | 15 21    | TG       | YES                    | 63.10679612       |
| L70 <i>ARID1A</i> | 1          | 27022940       | 27022942     | CCG | -   | rs748085214 | 1 20     | NA       | NA                     | NA                |
| L70 <i>ARID1A</i> | 1          | 27100182       | 27100184     | GCA | -   | rs374564889 | 16 20    | GCA/GCA  | NO                     | 0                 |
| L70 <i>BAIL</i>   | 8          | 143545614      | 143545616    | CTG | -   | rs777000151 | 1 30     | CTG/CTG  | NO                     | 0                 |
| L72 <i>RB1</i>    | 13         | 49030485       | 49030485     | G   | C   | rs483352690 | 19 27    | GG       | NO                     | 0                 |
| L72 <i>AXINI</i>  | 16         | 396361         | 396361       | C   | T   | rs763104413 | 2 11     | CT       | YES                    | 63.53211009       |
| L72 <i>TP53</i>   | 17         | 7577534        | 7577534      | C   | A   | rs28934571  | 7 11     | NA       | NA                     | NA                |
| L76 <i>SETD2</i>  | 3          | 47125476       | 47125476     | G   | A   | .           | 12 21    | GG       | NO                     | 0                 |
| L76 <i>SETD2</i>  | 3          | 47164730       | 47164730     | T   | A   | .           | 3 21     | TT       | NO                     | 0                 |
| L76 <i>SETD2</i>  | 3          | 47164731       | 47164731     | A   | T   | .           | 3 21     | AA       | NO                     | 0                 |
| L76 <i>TSC2</i>   | 16         | 2114340        | 2114340      | T   | A   | .           | 15 42    | NA       | NA                     | NA                |
| L76 <i>TP53</i>   | 17         | 7577610        | 7577610      | T   | A   | .           | 7 11     | TT       | NO                     | 0                 |
| L76 <i>TP53</i>   | 17         | 7578550        | 7578550      | G   | C   | rs730881999 | 5 11     | GG       | NO                     | 0                 |
| L81 <i>ARID1A</i> | 1          | 27100182       | 27100184     | GCA | -   | rs374564889 | 16 20    | GCA      | NO                     | 0                 |
| L81 <i>ARID1A</i> | 1          | 27022940       | 27022942     | CCG | -   | rs748085214 | 1 20     | NA       | NA                     | NA                |
| L81 <i>BAI3</i>   | 6          | 69944975       | 69944975     | C   | G   | .           | 19 32    | CG       | YES                    | 7.226107226       |
| L81 <i>BAIL</i>   | 8          | 143545614      | 143545616    | CTG | -   | rs777000151 | 1 30     | CTG/CTG  | NO                     | 0                 |
| L82 <i>BAI3</i>   | 6          | 70098643       | 70098643     | A   | T   | .           | 32 32    | AT       | YES                    | 11.25541126       |
| L83 <i>CTNNB1</i> | 3          | 41266124       | 41266124     | A   | G   | .           | 3 15     | GA       | YES                    | 14.50094162       |
| L83 <i>TERT</i>   | 5          | 1295228        | 1295228      | G   | A   | .           | N A      | GA       | YES                    | 20.63492063       |
| L84 <i>TP53</i>   | 17         | 7578188        | 7578188      | C   | A   | .           | 6 11     | CG       | YES                    | 21.74757282       |
| L85 <i>TP53</i>   | 17         | 7577082        | 7577082      | C   | T   | .           | 8 11     | CT       | YES                    | 20.66549912       |
| L86 <i>TERT</i>   | 5          | 1295228        | 1295228      | G   | A   | .           | N A      | GA       | YES                    | 16.42105263       |
| L92 <i>TP53</i>   | 17         | 7576870        | 7576870      | C   | A   | .           | 9 11     | CA       | YES                    | 19.01709402       |
| L92 <i>CTNNB1</i> | 3          | 41266113       | 41266113     | C   | T   | .           | 3 15     | CT       | YES                    | 27.7486911        |
| L92 <i>TERT</i>   | 5          | 1295228        | 1295228      | G   | A   | .           | N A      | GA       | YES                    | 12.44725738       |

| Gene               | Chromosome | Start position | End position | Ref   | Alt | dbSNP RS    | Exon num | CTC site | Consistency with tumor | Positive ratio(%) |
|--------------------|------------|----------------|--------------|-------|-----|-------------|----------|----------|------------------------|-------------------|
| L96 <i>CTNNB1</i>  | 3          | 41266098       | 41266098     | A     | G   | .           | 3 15     | AG       | YES                    | 14.34782609       |
| L96 <i>TP53</i>    | 17         | 7578406        | 7578406      | C     | T   | .           | 5 11     | CT       | YES                    | 39.41176471       |
| L99 <i>RBI</i>     | 13         | 48919223       | 48919223     | A     | T   | .           | 4 27     | AA       | NO                     | 0                 |
| L99 <i>TP53</i>    | 17         | 7578469        | 7578469      | C     | T   | rs762846821 | 5 11     | CC       | NO                     | 0                 |
| L99 <i>TP53</i>    | 17         | 7578444        | 7578467      | GATC- | .   | .           | 5 11     | GGT/GAT  | NO                     | 0                 |
| L99 <i>TP53</i>    | 17         | 7574035        | 7574035      | T     | A   | .           | 10 11    | TA       | YES                    | 14.28571429       |
| L100 <i>AXINI</i>  | 16         | 396792         | 396792       | G     | -   | .           | 2 11     | G/-      | YES                    | 50                |
| L100 <i>ARID2</i>  | 12         | 46245966       | 46245966     | A     | T   | .           | 15 21    | AT       | YES                    | 12.19512195       |
| L100 <i>TSC2</i>   | 16         | 2108755        | 2108755      | A     | G   | rs1800748   | 10 42    | AG       | YES                    | 43.7007874        |
| L100 <i>TSC2</i>   | 16         | 2112569        | 2112569      | G     | T   | .           | 13 42    | GT       | YES                    | 29.92957746       |
| L100 <i>TSC2</i>   | 16         | 2121870        | 2121870      | G     | A   | rs200494044 | 19 42    | AG       | YES                    | 9.554140127       |
| L100 <i>AXINI</i>  | 16         | 396815         | 396815       | C     | A   | .           | 2 11     | CA       | YES                    | 30.73047859       |
| L100 <i>PIK3R5</i> | 17         | 8792116        | 8792118      | CCT   | -   | rs757971428 | 10 19    | CCT/CCT  | NO                     | 0                 |
| L102 <i>TP53</i>   | 17         | 7577548        | 7577548      | C     | T   | .           | 7 11     | CT       | YES                    | 42.48496994       |
| L102 <i>ARID1A</i> | 1          | 27100182       | 27100184     | GCA   | -   | rs374564889 | 16 20    | GCA/GCA  | NO                     | 0                 |
| L102 <i>ARID2</i>  | 12         | 46246020       | 46246020     | T     | G   | .           | 15 21    | TG       | YES                    | 62.94027565       |
| L102 <i>TSC2</i>   | 16         | 2138304        | 2138304      | A     | C   | .           | 41 42    | AC       | YES                    | 22.53164557       |
| L102 <i>AXINI</i>  | 16         | 396176         | 396176       | T     | A   | .           | 2 11     | TA       | YES                    | 35.14492754       |
| L102 <i>TP53</i>   | 17         | 7577547        | 7577547      | C     | A   | .           | 7 11     | CA       | YES                    | 47.86641929       |
| L102 <i>BAI3</i>   | 6          | 70070920       | 70070920     | A     | C   | .           | 29 32    | AC       | YES                    | 47.5              |
| L102 <i>BAI1</i>   | 8          | 143545614      | 143545616    | CTG   | -   | rs777000151 | 1 30     | CTG/CTG  | NO                     | 0                 |
| L102 <i>ATRX</i>   | X          | 76907782       | 76907784     | TCC   | -   | rs398123423 | 15 35    | TCC/TCC  | NO                     | 0                 |
| L103 <i>HEG1</i>   | 3          | 124732416      | 124732417    | -     | GAA | rs754557087 | 6 17     | GGAGGA   | YES                    | 50                |
| L104 <i>ARID2</i>  | 12         | 46243401       | 46243403     | ATT   | -   | .           | 14 21    | ATT/-    | YES                    | 50                |
| L104 <i>ARID2</i>  | 12         | 46243404       | 46243404     | C     | G   | .           | 14 21    | GC       | YES                    | 21.48760331       |
| L104 <i>ZFHX3</i>  | 16         | 72822563       | 72822564     | -     | TGC | rs376311468 | 10 10    | TGC/-    | YES                    | 50                |
| L104 <i>TP53</i>   | 17         | 7578552        | 7578552      | G     | C   | .           | 5 11     | CG       | YES                    | 20.83333333       |
| L104 <i>TERT</i>   | 5          | 1295228        | 1295228      | G     | A   | .           | N A      | AG       | YES                    | 27.31376975       |
| L108 <i>KIT</i>    | 4          | 55592079       | 55592079     | C     | G   | rs200518498 | 9 21     | CG       | YES                    | 18.16143498       |

| Gene             | Chromosome | Start_position | End_position | Ref   | Alt | dbSNP_RS | Exon_num | CTC site  | Consistency with tumor | Positive ratio(%) |
|------------------|------------|----------------|--------------|-------|-----|----------|----------|-----------|------------------------|-------------------|
| L108 <i>TP53</i> | 17         | 7577600        | 7577611      | AGAC- | .   |          | 7 11     | <i>NA</i> | <i>NA</i>              | <i>NA</i>         |

**Table S5. Correlation between clinical parameters and CTC number or proliferative CTC percentage in peripheral blood**

|                             | <i>N</i> | CTC Nmuber (per/7.5ml)<br>Mean ± SD (range) | <i>P</i> value | PCP (%)<br>Mean ± SD (range) | <i>P</i> value |
|-----------------------------|----------|---------------------------------------------|----------------|------------------------------|----------------|
| Age (years)                 |          |                                             | 0.476          |                              | 0.0766         |
| ≤60                         | 193      | 16 ± 16.45 (0-140)                          |                | 22.30 ± 23.52 (0-92.88)      |                |
| >60                         | 77       | 14 ± 14.83 (0-75)                           |                | 16.67 ± 23.65 (0-84.62)      |                |
| Sex                         |          |                                             | 0.7685         |                              | 0.2162         |
| Female                      | 42       | 15.5 ± 12.20 (0-60)                         |                | 17.50 ± 21.45 (0-76.08)      |                |
| Male                        | 228      | 15 ± 16.59 (0-140)                          |                | 20.83 ± 23.94 (0-92.88)      |                |
| AFP                         |          |                                             | 0.0041         |                              | 0.0135         |
| ≤20                         | 123      | 13 ± 18.04 (0-140)                          |                | 16.67 ± 23.87 (0-92.88)      |                |
| >20 ng/ml                   | 147      | 17 ± 13.95 (0-75)                           |                | 25.00 ± 23.17 (0-90.00)      |                |
| Prior treatment             |          |                                             | 0.0033         |                              | 0.247          |
| Absent                      | 187      | 15 ± 15.14 (0-140)                          |                | 20.00 ± 23.45 (0-92.88)      |                |
| Present                     | 83       | 18 ± 17.25 (0-106)                          |                | 25.00 ± 23.94 (0-87.30)      |                |
| Surgical procedure          |          |                                             | 0.0063         |                              | 0.0481         |
| Hepatectomy                 | 139      | 14 ± 14.26 (0-75)                           |                | 18.52 ± 24.71 (0-92.88)      |                |
| Liver transplantation       | 131      | 17 ± 17.47 (0-140)                          |                | 26.67 ± 22.28 (0-86.16)      |                |
| Differentiation             |          |                                             | 0.8746         |                              | 0.8008         |
| Good                        | 13       | 13 ± 14.68 (0-45)                           |                | 18.89 ± 26.68 (0-72.22)      |                |
| Moderate                    | 171      | 15 ± 15.52 (0-140)                          |                | 20.83 ± 23.32 (0-92.88)      |                |
| Poor                        | 84       | 15 ± 16.68 (0-106)                          |                | 18.90 ± 23.81 (0-91.67)      |                |
| MVI                         |          |                                             | <0.0001        |                              | <0.0001        |
| Absent                      | 193      | 13 ± 11.58 (0-106)                          |                | 17.22 ± 20.16 (0-92.88)      |                |
| Present                     | 77       | 23 ± 20.26 (0-140)                          |                | 40.00 ± 26.79 (0-91.67)      |                |
| Tumor thrombosis            |          |                                             | <0.0001        |                              | <0.0001        |
| Absent                      | 228      | 14 ± 11.26 (0-60)                           |                | 17.48 ± 21.23 (0-92.88)      |                |
| Present                     | 42       | 25 ± 26.19 (10-140)                         |                | 47.41 ± 25.71 (0-86.16)      |                |
| Largest tumor diameter (mm) |          |                                             | 0.0003         |                              | 0.0002         |
| ≤50                         | 185      | 14 ± 10.93 (0-60.22)                        |                | 17.53 ± 21.81 (0-92.88)      |                |
| >50                         | 85       | 17 ± 22.26 (0-140)                          |                | 35.00 ± 25.34 (0-91.67)      |                |
| Tumor number                |          |                                             | <0.0001        |                              | 0.0017         |
| Single                      | 225      | 15 ± 11.75 (0-71)                           |                | 19.35 ± 22.64 (0-92.88)      |                |

|            | <i>N</i> | CTC Nmuber (per/7.5ml)<br>Mean ± SD (range) | <i>P</i> value | PCP (%)<br>Mean ± SD (range) | <i>P</i> value |
|------------|----------|---------------------------------------------|----------------|------------------------------|----------------|
| Multi      | 45       | 23 ± 25.56 (5-140)                          |                | 38.89 ± 25.60 (0-86.16)      |                |
| AJCC stage |          |                                             | <0.0001        |                              | 0.0005         |
| 1          | 153      | 12 ± 8.28 (0-63)                            |                | 17.34 ± 22.01 (0-92.88)      |                |
| 2          | 93       | 19.67 ± 15.13 (0-106)                       |                | 24.72 ± 24.82 (0-91.67)      |                |
| 3+4        | 24       | 35 ± 25.14 (11-140)                         |                | 38.89 ± 22.23 (0-87.30)      |                |
| BCLC stage |          |                                             | <0.0001        |                              | <0.0001        |
| A          | 207      | 13 ± 9.38 (0-63)                            |                | 18.21 ± 22.00 (0-92.88)      |                |
| B          | 34       | 23 ± 17.12 (3-106)                          |                | 25.04 ± 22.26 (0-91.67)      |                |
| C          | 29       | 38.67 ± 24.62 (17-140)                      |                | 44.44 ± 27.39 (0-87.30)      |                |

AJCC, American Joint Committee on Cancer; BCLC, Barcelona clinic liver cancer stage; MVI, microvascular invasion; AFP, alpha-fetoprotein; CTC, circulating tumor cell; PCP, proliferative CTC percentage.



**Table S6. Cox regression model to evaluate recurrence-free survival based on patient characteristics analyzed according to a univariable and multivariable analyses**

| Variable                                          | Univariable analysis |             |                | Multivariable analysis |            |                |
|---------------------------------------------------|----------------------|-------------|----------------|------------------------|------------|----------------|
|                                                   | HR                   | 95% CI      | <i>P</i> value | HR                     | 95% CI     | <i>P</i> value |
| Age (≤60 vs. >60)                                 | 1.12                 | 0.59-2.12   | 0.7356         |                        |            |                |
| Sex (male vs. female)                             | 1.08                 | 0.48-2.43   | 0.8522         |                        |            |                |
| Operation (hepatectomy vs. liver transplantation) | 0.75                 | 0.33-1.70   | 0.4956         |                        |            |                |
| Virus infection (yes vs. no)                      | 1.04                 | 0.32-3.37   | 0.9461         |                        |            |                |
| Multiple nodules (yes vs. no)                     | 4.98                 | 2.61-9.51   | <0.0001***     | 0.79                   | 0.86-3.72  | 0.1216         |
| MVI (yes vs. no)                                  | 8.7                  | 4.36-17.36  | <0.0001***     | 3                      | 1.23-7.31  | 0.0157*        |
| Thrombosis (yes vs. no)                           | 4.7                  | 2.51-8.80   | <0.0001***     | 0.81                   | 0.36-1.79  | 0.5961         |
| AFP (≤20 vs. >20 ng/ml)                           | 1.4                  | 0.75-2.62   | 0.2855         |                        |            |                |
| Differentiation (Poor vs. Good/moderate)          | 0.97                 | 0.51-1.84   | 0.9156         |                        |            |                |
| Tumor diameter (≤50 mm vs. >50 mm)                | 2.27                 | 1.24-4.15   | 0.0081**       | 1.07                   | 0.47-2.45  | 0.8659         |
| CTCs number (≤15 vs. >15 /7.5ml)                  | 11.89                | 5.00-28.30  | <0.0001***     | 2.96                   | 1.07-8.21  | 0.0375*        |
| CTC cluster (yes vs. no)                          | 13.97                | 7.00-27.88  | <0.0001***     | 3.79                   | 1.65-8.72  | 0.0017**       |
| PCP (≤29.6% vs. >29.6%)                           | 26.88                | 11.78-61.31 | <0.0001***     | 13.18                  | 5.01-34.67 | <0.0001***     |

\*, \*\*, \*\*\* denote a *P* value of <0.05, <0.01 and <0.001 respectively. RFS, recurrence free survival; HCC, hepatocellular carcinoma; MVI, microvascular invasion; AFP, alpha-fetoprotein; CTC, circulating tumor cell; PCP, proliferative CTC percentage.
